# Supplementary material for: CRISPR/Cpf1-mediated DNA-free plant genome editing
Source: PubMed Central journal article supplement (PMC5316869; doi:10.1038/ncomms14406), 2017-02-16
Supplement: ncomms14406-s1.pdf [file ncomms14406-s1.pdf]

## Supplementary Information

### Supplementary Figure 1

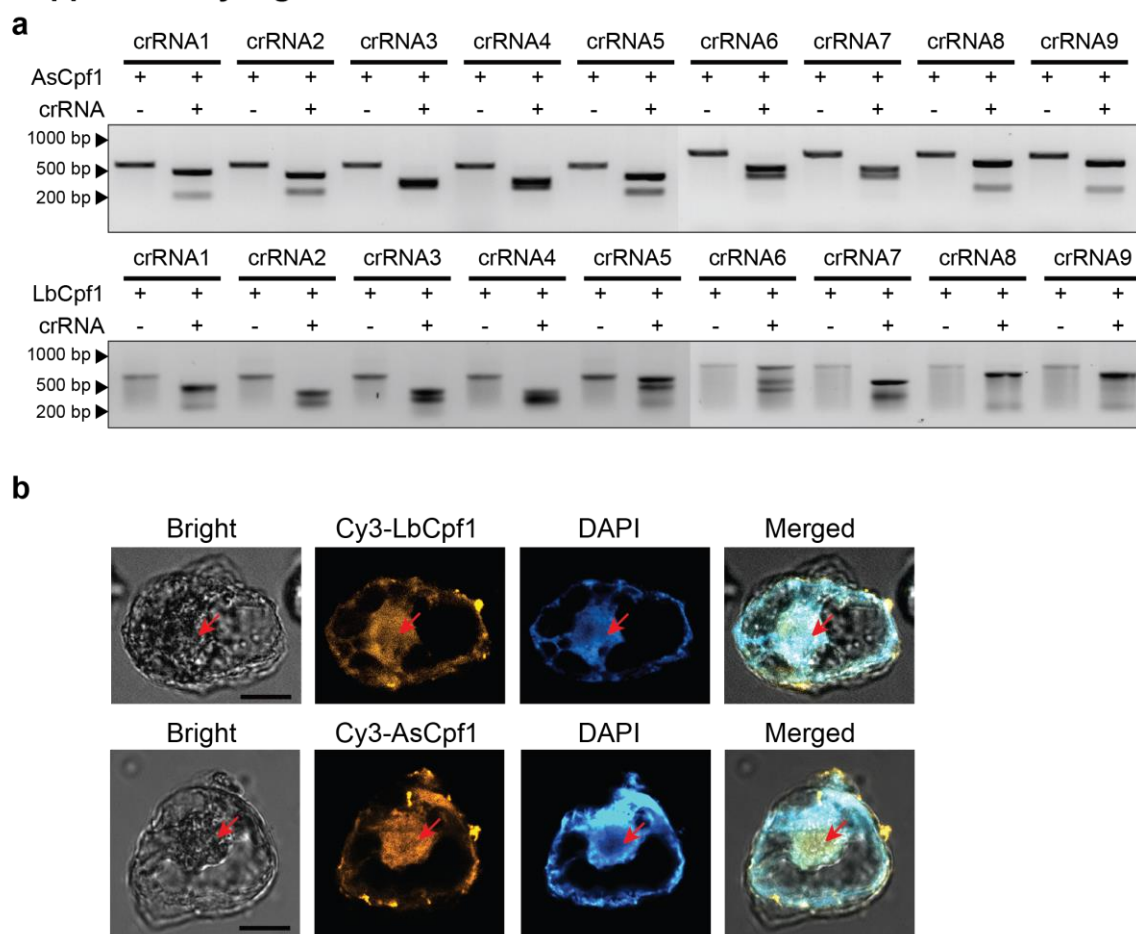

**Supplementary Figure 1.** *In vitro* cleavage assay for 9 crRNA-LbCpf1 complexes and localization of Cpf1 proteins in soybean protoplasts. (a) Preassembled AsCpf1-crRNA and LbCpf1-crRNA complexes cleave their target DNA *in vitro*. (b) Both Cy3-conjugated Cpf1 proteins were targeted to the nucleus of soybean protoplasts. The red arrow indicates the nucleus. DAPI, a nuclear marker. Bars = 10  $\mu$ m.

**Supplementary Figure 2**

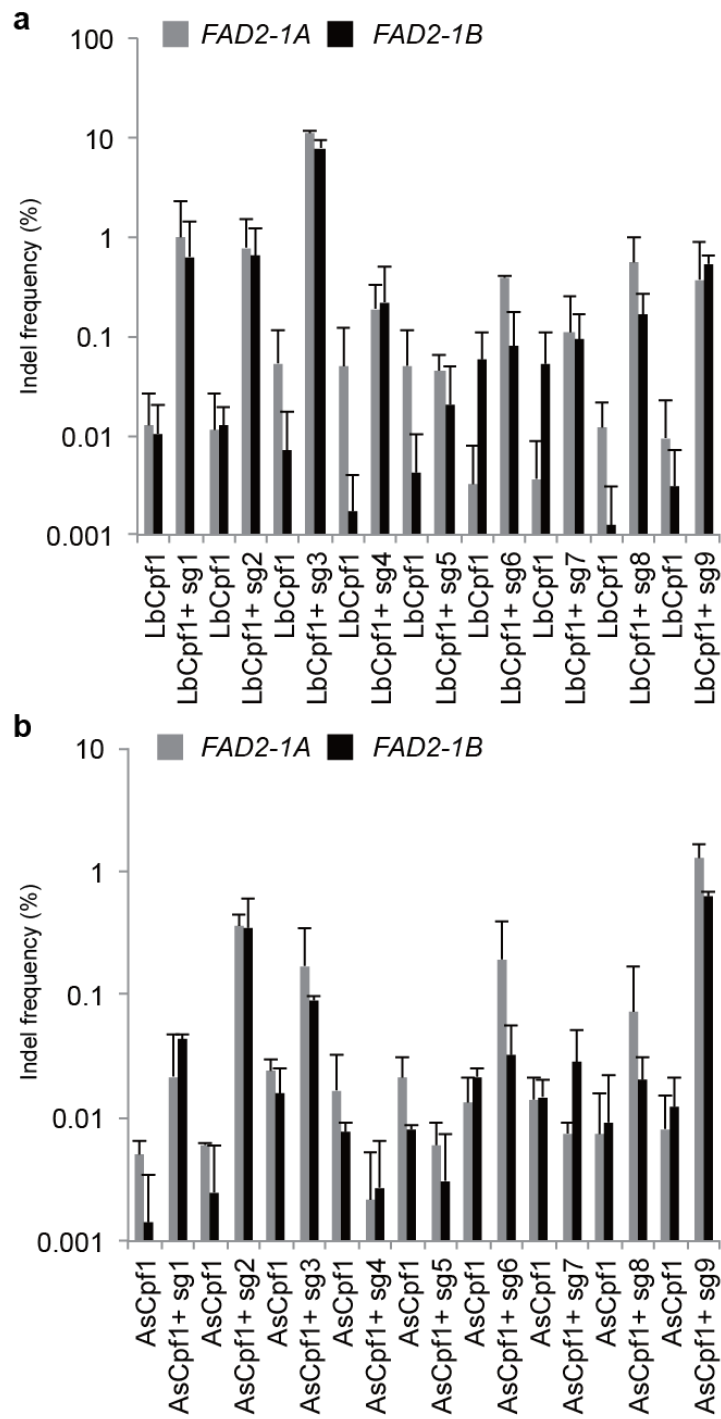

**Supplementary Figure 2.** Indel frequencies (% , Log<sub>10</sub> scale at Y-axis) for 9 crRNAs at target sites in *FAD2-1A* and *FAD2-1B*. Error bars represent standard deviation (n = 2).

### Supplementary Figure 3

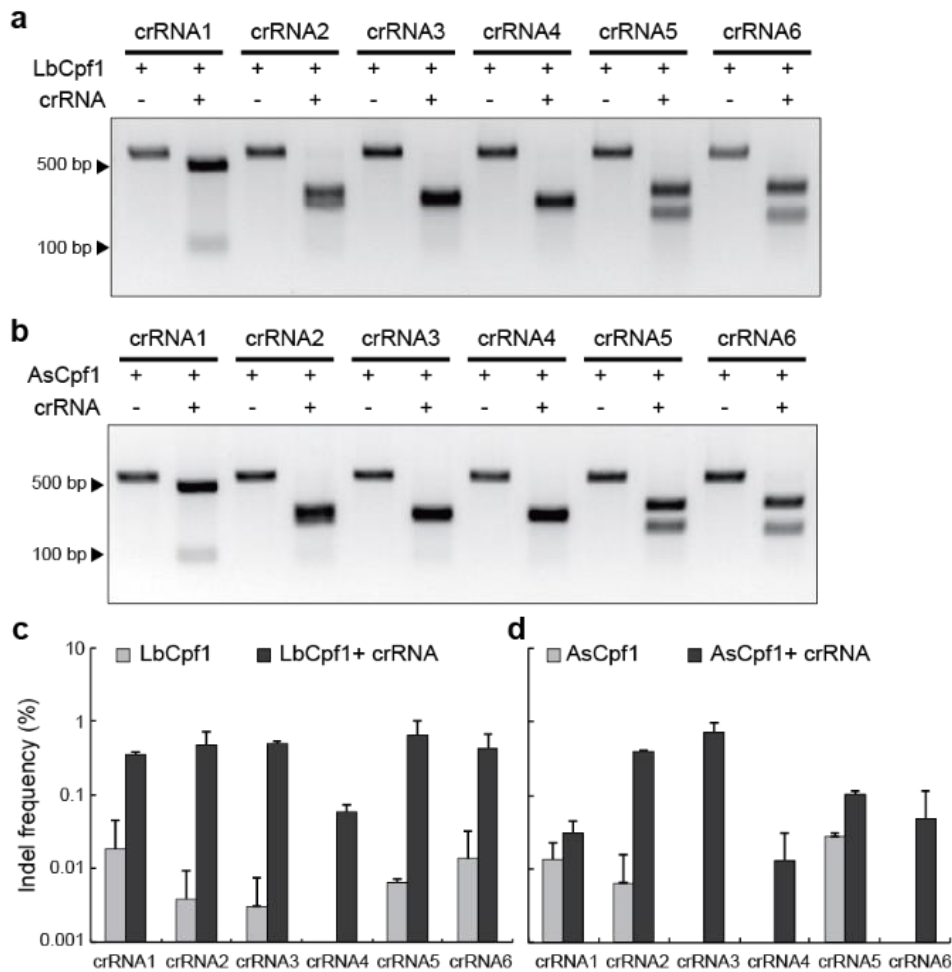

**Supplementary Figure 3.** CRISPR/Cpf1-mediated editing of the *AOC* gene in *Nicotiana attenuata* protoplasts. *In vitro* cleavage assay for 6 crRNAs complexed with (a) LbCpf1 and (b) AsCpf1 proteins. Indel frequencies (%; Log<sub>10</sub> scale at Y-axis) at the target sites in protoplasts for 6 crRNAs complexed with (c) LbCpf1 and (d) AsCpf1 proteins. *AOC*, *ALLEN OXIDE CYCLASE*. Error bars represent standard deviation (n = 2).

### Supplementary Figure 4

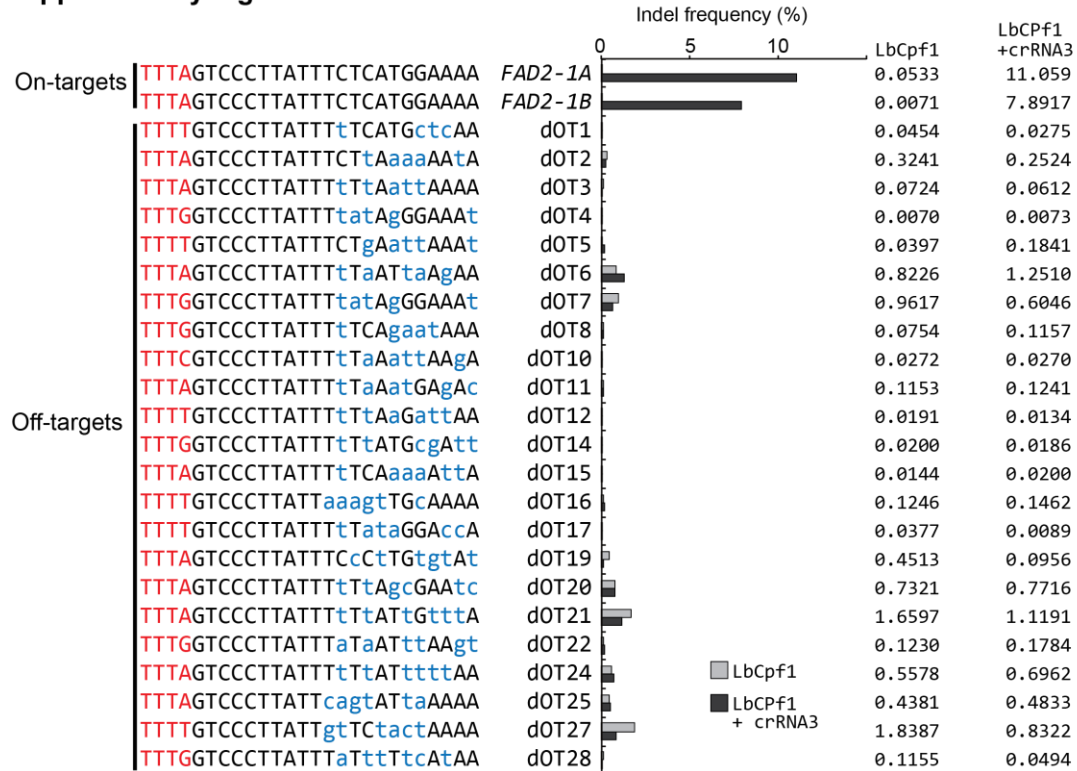

**Supplementary Figure 4.** *In vivo* evaluation of LbCpf1-crRNA3 activity at potential off-target sites in the genome. The indel frequencies (%) at 23 candidate distal off-target (dOT) sites (with up to 6 bp mismatches relative to the crRNAs) were measured and validated in LbCpf1-crRNA3-delivered soybean protoplasts by targeted deep sequencing. No mutations were detected at any of the 23 candidate loci. Red, PAM sequences; blue, mismatched nucleotide bases. Note, dOT21 and dOT27 have relatively high frequency of indel in some control samples, which we have frequently seen in AT-rich and A- or T-repeat regions<sup>12</sup>

### Supplementary Figure 5

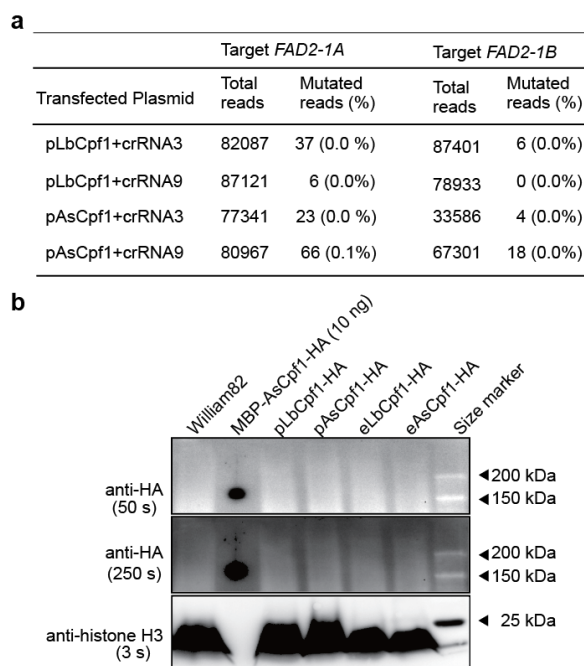

**Supplementary Figure 5.** Editing activity of plasmid-expressed Cpf1 and Cpf1 expression in soybean protoplasts. (a) Indel frequencies (%) at two *FAD2* loci after transformation with the plasmid harboring plant-codon optimized LbCpf1-HA or AsCpf1-HA. (b) Protein expression from a plant codon (pLbCpf1/pAsCpf1) or *E. coli* codon (eLbCpf1/eAsCpf1) optimized Cpf1 plasmid in soybean protoplasts. The anti-HA antibody detects the Cpf1 protein and the anti-histone H3 antibody detects an endogenous soybean protein.

**Supplementary Table 1.** List of crRNAs used in this study.

| Target gene                              | Name   | <sup>a</sup> Sequence        |
|------------------------------------------|--------|------------------------------|
| <i>Glycin max</i><br><i>FAD2-1A/B</i>    | crRNA1 | TTTCACATTGCCACCACCTACTTCC    |
|                                          | crRNA2 | TTTCCTCATTGCATGGCCAATCTAT    |
|                                          | crRNA3 | TTTAGTCCCTTATTTCTCATGGAAAA   |
|                                          | crRNA4 | TTTCATGGAAAATAAGCCATCGCC     |
|                                          | crRNA5 | TTTGTCCTCCAAAACAAAATCCAAAGT  |
|                                          | crRNA6 | TTTGCTGCTATGTGTTTATGGGGTG    |
|                                          | crRNA7 | TTTGGCAACTATGGACAGAGATTATG   |
|                                          | crRNA8 | TTTGATGACACACCATTTTACAAGGC   |
|                                          | crRNA9 | TTTACAAGGCACTGTGGAGAGAAGC    |
| <i>Nicotiana attenuata</i><br><i>AOC</i> | crRNA1 | TTTGTTGCTAAAGGGGACAAGATCTCC  |
|                                          | crRNA2 | TTTGATCAGAATGCAGAGTCCAGCCGT  |
|                                          | crRNA3 | TTTCCTCTTCGTGTTTGATCAGAATGC  |
|                                          | crRNA4 | TTTCTTTTCCTCTTCGTGTTTGATCAG  |
|                                          | crRNA5 | TTTACAGCTTCTATTTTCGGCGATTATG |
|                                          | crRNA6 | TTTCGGCGATTATGGTCACATCGCCGT  |

<sup>a</sup>Red indicates the PAM sequence.

**Supplementary Table 2.** List of putative off-target sequences of FAD2-targeted crRNA3 in the soybean genome.

| <sup>a</sup> Off-target sequence | Chr.  | Position | Direction | Mismatches | Name              |
|----------------------------------|-------|----------|-----------|------------|-------------------|
| TTTGGTCaCTaATTTCTCATGGATcA       | chr5  | 7021658  | +         | 4          | <sup>b</sup> OT1  |
| TTTTGTCTCTTTTTTTTCATcGAAAA       | chr6  | 14339586 | +         | 4          | OT2               |
| TTTGGaCCCTTATTTacCATGGAcAA       | chr7  | 9126069  | -         | 4          | OT3               |
| TTTTGCaCTcATTTTCATGGAAAA         | chr7  | 29877437 | -         | 4          | OT4               |
| TTTTGTttCTTATTTCTCATtGAAAg       | chr8  | 6892768  | -         | 4          | OT5               |
| TTTCGTCCgTTATTTtATGAAAA          | chr8  | 20703738 | -         | 4          | OT6               |
| TTTTGTCCCTTTTTTTTCATttAAAA       | chr9  | 18027312 | +         | 4          | OT7               |
| TTTTGTCaCaaATTTTCATGGAAAA        | chr10 | 2521140  | +         | 4          | OT8               |
| TTTAGTCTcTTATTTCTaATaaAAAA       | chr10 | 48025754 | +         | 4          | OT9               |
| TTTGGTCCtTTATTTCCcATtGAtAA       | chr11 | 28094966 | +         | 4          | OT10              |
| TTTctTCCCTTTTTTCTCATaaAAAA       | chr12 | 20572847 | -         | 4          | OT11              |
| TTTTGTCCCTTATTTTCATGctcAA        | chr17 | 2674940  | +         | 4          | OT12              |
| TTTGGTCaCTaATTTCTCATGGATcA       | chr17 | 12553219 | +         | 4          | OT13              |
| TTTTGTCCCTTATTTTCATGctcAA        | chr17 | 2674940  | +         | 4          | <sup>c</sup> dOT1 |
| TTTAGTCCCTTATTTCTtAaaaAAAtA      | chr1  | 1189388  | +         | 5          | dOT2              |
| TTTAGTCCCTTATTTtTAattAAAA        | chr9  | 3561633  | -         | 5          | dOT3              |
| TTTGGTCCCTTATTTtatAgGGAAAt       | chr11 | 15389742 | +         | 5          | dOT4              |
| TTTTGTCCCTTATTTCTgAattAAAt       | chr15 | 43359905 | -         | 5          | dOT5              |
| TTTAGTCCCTTATTTtAAttaAgAA        | chr17 | 11701652 | -         | 5          | dOT6              |
| TTTGGTCCCTTATTTtatAgGGAAAt       | chr18 | 4987048  | +         | 5          | dOT7              |
| TTTGGTCCCTTATTTtTCagaatAAA       | chr18 | 11727316 | +         | 5          | dOT8              |
| TTTTGTCCCTTATTTCTgAattAAAt       | chr18 | 44803139 | -         | 5          | dOT9              |
| TTTCGTCCCTTATTTtAaattAAGa        | chr2  | 39113938 | +         | 6          | dOT10             |
| TTTAGTCCCTTATTTtAaAtGAGAc        | chr3  | 43408144 | +         | 6          | dOT11             |
| TTTTGTCCCTTATTTtTtAaGattAA       | chr3  | 43679365 | +         | 6          | dOT12             |
| TTTAGTCCCTTATTTttagcGGAttA       | chr4  | 8732797  | +         | 6          | dOT13             |
| TTTGGTCCCTTATTTtTtATGcgAtt       | chr5  | 37988161 | +         | 6          | dOT14             |
| TTTAGTCCCTTATTTtTCAaaaAttA       | chr6  | 45888996 | +         | 6          | dOT15             |
| TTTTGTCCCTTATTaaagtTGcAAAA       | chr7  | 17897295 | +         | 6          | dOT16             |
| TTTTGTCCCTTATTTtTataGGAccA       | chr11 | 25098470 | -         | 6          | dOT17             |
| TTTAGTCCCTTATTTtaaAaaaaAAAA      | chr13 | 40317930 | -         | 6          | dOT18             |
| TTTAGTCCCTTATTTcCtTgtgtAt        | chr13 | 44326839 | -         | 6          | dOT19             |
| TTTAGTCCCTTATTTtTtAgcGAAtc       | chr14 | 45961325 | -         | 6          | dOT20             |
| TTTAGTCCCTTATTTtTtATtGtttA       | chr15 | 9547205  | -         | 6          | dOT21             |
| TTTGGTCCCTTATTTtAaAtttAAgt       | chr16 | 7599366  | -         | 6          | dOT22             |
| TTTAGTCCCTTATTTtaaATatAAAc       | chr16 | 29724887 | +         | 6          | dOT23             |
| TTTAGTCCCTTATTTtTtATttttAA       | chr17 | 38497391 | +         | 6          | dOT24             |
| TTTAGTCCCTTATTcagtATtaAAAA       | chr18 | 5202244  | +         | 6          | dOT25             |
| TTTTGTCCCTTATTTcAtATtAttA        | chr19 | 2704492  | -         | 6          | dOT26             |
| TTTTGTCCCTTATTgtTctactAAAA       | chr19 | 45846421 | +         | 6          | dOT27             |
| TTTGGTCCCTTATTTaTttTtcAtAA       | chr19 | 49944362 | -         | 6          | dOT28             |
| TTTTGTCCCTTATTTtaaATtGgAgA       | chr20 | 26326125 | +         | 6          | dOT29             |

<sup>a</sup>Red indicates the mismatch sequence.

<sup>b</sup>OT indicates off-target sites with up to 4 nucleotide mismatches.

<sup>c</sup>dOT indicates off-target sites with up to 6 nucleotide mismatches in the distal region.

**Supplementary Table 3. List of primers used for targeted deep sequencing.**

| Name                | Sequence                                                    | Name                | Sequence                                  |
|---------------------|-------------------------------------------------------------|---------------------|-------------------------------------------|
| FAD2-1A nested F    | ATTGATAGCCCTCCGTTC                                          | FAD2-1A nested R    | AGTCATTACGCGGCAATCC                       |
| FAD2-1A F1 crRNA1,2 | CACCATTCACTGTTGGCCAA                                        | FAD2-1A R1 crRNA1,2 | CCCACAACATCATCAACCCA                      |
| FAD2-1A F2 crRNA3-5 | CTGGTGTGGGTGATTGC                                           | FAD2-1A R2 crRNA3-5 | ACGAGAAGAGAAACAGCCCT                      |
| FAD2-1A F3 crRNA6,7 | ACTCTCTACCGTGTGCA                                           | FAD2-1A R3 crRNA6,7 | TGTAGAGAAGAGATGGTGAAGCC                   |
| FAD2-1A F4 crRNA8,9 | CAACCAATGCAATCAAGCCA                                        | FAD2-1A R4 crRNA8,9 | AGTCATTACGCGGCAATCC                       |
| FAD2-1B nested F    | GGCACCTACAATATCAGCACT                                       | FAD2-1B nested R    | TGACAAAACCTCCATAACTCCCA                   |
| FAD2-1B F1 crRNA1,2 | CACCATTCACTGTTGGCCAA                                        | FAD2-1B R1 crRNA1,2 | CCCATGGGTACTGTGTA                         |
| FAD2-1B F2 crRNA3-5 | CTTTCAGCAAGTACCAATGG                                        | FAD2-1B R2 crRNA3-5 | CTGCCAGAGACATTGAAGGC                      |
| FAD2-1B F3 crRNA6,7 | TTGCTCTACCGTGTGCAAC                                         | FAD2-1B R3 crRNA6,7 | GCCTCCGTGTGATGGTAAT                       |
| FAD2-1B F4 crRNA8,9 | ATAACTGATACTCATGTGGCTCA                                     | FAD2-1B R4 crRNA8,9 | TGACAAAACCTCCATAACTCCCA                   |
| FAD2-1A 2nd F1      | ACACTCTTCCCTACACGACGCTCTCCGATCTCACCATTCACTGTTGGCCAA         |                     |                                           |
| FAD2-1A 2nd R1      | GTGACTGGAGTTCAGACGTGTGCTCTCCGATCTCCACAACATCATCAACCCA        |                     |                                           |
| FAD2-1A 2nd F2      | ACACTCTTCCCTACACGACGCTCTCCGATCTCTGGTGTGGGTGATTGC            |                     |                                           |
| FAD2-1A 2nd R2      | GTGACTGGAGTTCAGACGTGTGCTCTCCGATCTACGAGAAGAGAAACAGCCCT       |                     |                                           |
| FAD2-1A 2nd F3      | ACACTCTTCCCTACACGACGCTCTCCGATCTACTCTCTACTCCGTGTGCA          |                     |                                           |
| FAD2-1A 2nd R3      | GTGACTGGAGTTCAGACGTGTGCTCTCCGATCTTGTAGAGAAGAGATGGTGAAGCC    |                     |                                           |
| FAD2-1A 2nd F4      | ACACTCTTCCCTACACGACGCTCTCCGATCTCAACCAATGCAATCAAGCCA         |                     |                                           |
| FAD2-1A 2nd R4      | GTGACTGGAGTTCAGACGTGTGCTCTCCGATCTAGTCAATACGCGGCAAAATCC      |                     |                                           |
| FAD2-1B 2nd F1      | ACACTCTTCCCTACACGACGCTCTCCGATCTCACCATTCACTGTTGGCCAA         |                     |                                           |
| FAD2-1B 2nd R1      | GTGACTGGAGTTCAGACGTGTGCTCTCCGATCTCCCAATGGGTACTTGTGAA        |                     |                                           |
| FAD2-1B 2nd F2      | ACACTCTTCCCTACACGACGCTCTCCGATCTCCTTCAGCAAGTACCAATGG         |                     |                                           |
| FAD2-1B 2nd R2      | GTGACTGGAGTTCAGACGTGTGCTCTCCGATCTTCCGATCTGCGAGAGACATTGAAGGC |                     |                                           |
| FAD2-1B 2nd F3      | ACACTCTTCCCTACACGACGCTCTCCGATCTTGTGCTTACCGTGTGCAAC          |                     |                                           |
| FAD2-1B 2nd R3      | GTGACTGGAGTTCAGACGTGTGCTCTCCGATCTGCTCCGTTGATGGTAAT          |                     |                                           |
| FAD2-1B 2nd F4      | ACACTCTTCCCTACACGACGCTCTCCGATCTATAAATGATACTCATGTGGCTCA      |                     |                                           |
| FAD2-1B 2nd R4      | GTGACTGGAGTTCAGACGTGTGCTCTCCGATCTTGACAAAACCTCCATAACTCCCA    |                     |                                           |
| crRNA3 OT4MM-1 F    | CCCAAACTTTTATGCTCGAAATTT                                    | crRNA3 OT4MM-1 R    | AAAACGTTCAATACACAACATTTAGGT               |
| crRNA3 OT4MM-2 F    | GCACGATGCGGAAAGATT                                          | crRNA3 OT4MM-2 R    | TTGACCTCCATTGTGTGA                        |
| crRNA3 OT4MM-3 F    | CCAACCTCAATATGGGTGCTG                                       | crRNA3 OT4MM-3 R    | CGCATTATGCTCATGTGACAA                     |
| crRNA3 OT4MM-4 F    | ACACATGCGGATCCACAATTTTT                                     | crRNA3 OT4MM-4 R    | ATTGACATGCATGTATATATGTGTG                 |
| crRNA3 OT4MM-5 F    | CAACAGCGATGTTAAAATGTACAGATAG                                | crRNA3 OT4MM-5 R    | CATGAGATTCAAAAATGCACCGT                   |
| crRNA3 OT4MM-6 F    | AAATATGTAATAATGCTGACAAATTCATCTC                             | crRNA3 OT4MM-6 R    | GGACATCTTCTCAGCATAGC                      |
| crRNA3 OT4MM-7 F    | TGACCATTTGGAGTGTGACACA                                      | crRNA3 OT4MM-7 R    | GACGAAAGACAGCGATTGGT                      |
| crRNA3 OT4MM-8 F    | AGGAAATTTAATCAGCGGACCTTTTA                                  | crRNA3 OT4MM-8 R    | TCAAAAATTTGGACGAAAAATCCA                  |
| crRNA3 OT4MM-9 F    | TAAGGATAGATTGAAAGTATTAGTCA                                  | crRNA3 OT4MM-9 R    | GCAATTAGCATCGCATCAAAAAT                   |
| crRNA3 OT4MM-10 F   | GCGGCTTTCATCTCTTTGAG                                        | crRNA3 OT4MM-10 R   | GCTGTATTAATAATTAAGCATTCCC                 |
| crRNA3 OT4MM-11 F   | CAAAGTATGGCTTATAATGGAGAAC                                   | crRNA3 OT4MM-11 R   | GTTCCTTCAGTGGCACAA                        |
| crRNA3 OT4MM-12 F   | GCGGTACGGTTCAGATAGCA                                        | crRNA3 OT4MM-12 R   | TCTACCGTAGAACTACACAGGTG                   |
| crRNA3 OT4MM-13 F   | GGGCGCATTGTAAGACTAAA                                        | crRNA3 OT4MM-13 R   | TTTGGTATCTTTTTCGATTTCTATCAG               |
| LbCpf1crRNA         | GAAATTAATACGACTCACTATAGGG AATTTCTACTAAGTGTAGAT              |                     |                                           |
| LbCpf1 FAD2 sg1     | GGAAGTAGGTGGGCAATGTAATCTACACTTAGTAGAAATT                    | LbCpf1 FAD2 sg2     | ATAGATTGCCATGCAATGAGGATCTACACTTAGTAGAAATT |
| LbCpf1 FAD2 sg3     | TTTTCCATGAGAAAATAAGGACATCTACACTTAGTAGAAATT                  | LbCpf1 FAD2 sg4     | GGCGATGGCTTATTTCCATGAATCTACACTTAGTAGAAATT |
| LbCpf1 FAD2 sg5     | ACTTTGGATTTGGTTTTGGGAATCTACACTTAGTAGAAATT                   | LbCpf1 FAD2 sg6     | CACCCATAAACACATAGCAGCATCTACACTTAGTAGAAATT |
| LbCpf1 FAD2 sg7     | CATAATCTCTGTCCATAGTGTGATCTACACTTAGTAGAAATT                  | LbCpf1 FAD2 sg8     | GCCTTGTAATAAGTGTGTGATATCTACACTTAGTAGAAATT |
| LbCpf1 FAD2 sg9     | GCTTCTCTCCACAGTGCCTTGATCTACACTTAGTAGAAATT                   |                     |                                           |
| AsCpf1crRNA         | GAAATTAATACGACTCACTATAGGG TAATTTCTACTCTTGTAGAT              |                     |                                           |
| AsCpf1 FAD2 sg1     | GGAAGTAGGTGGGCAATGTAATCTACAAGAGTAGAAATTA                    | AsCpf1 FAD2 sg2     | ATAGATTGCCATGCAATGAGGATCTACAAGAGTAGAAATTA |
| AsCpf1 FAD2 sg3     | TTTTCCATGAGAAAATAAGGACATCTACAAGAGTAGAAATTA                  | AsCpf1 FAD2 sg4     | GGCGATGGCTTATTTCCATGAATCTACAAGAGTAGAAATTA |
| AsCpf1 FAD2 sg5     | ACTTTGGATTTGGTTTTGGGAATCTACAAGAGTAGAAATTA                   | AsCpf1 FAD2 sg6     | CACCCATAAACACATAGCAGCATCTACAAGAGTAGAAATTA |
| AsCpf1 FAD2 sg7     | CATAATCTCTGTCCATAGTGTGATCTACAAGAGTAGAAATTA                  | AsCpf1 FAD2 sg8     | GCCTTGTAATAAGTGTGTGATATCTACAAGAGTAGAAATTA |
| AsCpf1 FAD2 sg9     | GCTTCTCTCCACAGTGCCTTGATCTACAAGAGTAGAAATTA                   |                     |                                           |



Supplementary Note 1. Sequence information of Cpf1-harboring vectors.

p2GW7-eAsCpf1-HA, *E. coli*-codon optimized AsCpf1.

Amp-R35s promoter 5' NLS eAsCpf1 3' NLS HA Stop codon 35s terminator

```
GGCGTAATAGCGAAGAGGCCCGCACCGATCGCCCTTCCCAACAGTTGCGCAGCCTGAATGGCGAATGGACGCGCCCTGTAGCGGCGCATTAAGCGCGGCG
GGTGTGGTGGTTACGCGCAGCGTGACCGCTACACTTGCCAGCGCCCTAGCGCCCGCTCCTTTCGCTTTCTCCCTTCTTCCGCGCAGTTTCGCCGGCT
TTCCCGTCAAGCTCTAAATCGGGGGCTCCCTTTAGGGTTCCGATTTAGTGCCTTACCGCACCCTCGACCCCAAAAACTTGATAGGGTGATGTTCCACG
TAGTGGGCCATCGCCCTGATAGACGGTTTTTCGCCCTTTCGACGTTGGAGTCCACGTTCTTTAATAGTGGACTCTGTTCACAACTGGAACAACACTCAAC
CCTATCTCGGTCTATTCTTTTGGATTATAAGGGATTTTGGCCGATTTTCGCCCTATTGGTTAAAAAATGAGCTGATTTAACAAAAATTAACCGGAATTTTA
ACAAAAATATTAACGCTTACAATTTCTGATGCGGATTTTCTCCTTACGCATCTGTGCGGATTTACACCCGCATCAGGTGGCACTTTTCGGGGAAATGT
GCGCGGAACCCCTATTTGTTATTTTCTAAATACATTCAAATATGTATCCGCTCATGAGACAATAACCCTGATAAATGCTTCAATAATATTGAAAAAGG
AAGAGTATAGATATTCAACATTTCCGTGTGCGCCCTATTCCCTTTTTTTCGGGCGATTTTTCGCTTCTGTTTTGCTCACCCAGAAAACGCTGGTGAAGGTAA
AAGATGCTGAAGATCAGTTGGTGCACGAGTGGTTACATCGAAGTGGATCTCAACAGCGGTAAGATCCTTGAGAGTTTTTCGCCCCGAAGAAGCTTTTCC
AATGATGAGCACATTTTAAAGTTCTGCTATGTGGCGCGGATTTATCCGCTATTGACGCGGGCAAGAGCAACTCGGTCCGCCATACACTATTCTCAAGAA
GACTTGGTTGAGTACTACCAGTACAGAAAAGCATCTTACGGATGGCATGACAGTAAGAGAATTATGCAGTGCAGCCATAACCATGAGTGATAACACTG
CGGCCAATTACTTCTGACAACGATCGGAGGACCGAAGGAGTAAACCCTTTTTTCGACAACATGGGGGATCATGTAACCTCGCCTTGATCGTTGGGAACC
GGAGCTGAATGAAGCCATACCAACGACGAGCGGTGACACCACGATGCCTGTAGCAATGGCAACAACGTTGCGCAAACCTTAACTGGCGAACTACTTACT
CTAGCTTCCCGCAACAATTAAGACTGGATGGAGGCGGATAAAGTTGCAGGACCCTTCTGCGCTCGGCCCTCCGGCTGGCTGGTTATTGGCTGATA
AATCTGGAGCCGGTGGAGCTGGGTTCTGCGGATCATTGACGACTGGGGCCAGATGGTAAGCCCTCCGCTATCGTAGTTATCTACACGACGGGGAGTCA
GGCAACTATGGATGAACGAATAGACAGATCGCTGAGATAGTGCCTCACTGATTAAGCATTGGTAACTGTGACACCAAGTTTACTCATATATACTTTAG
ATTGATTTAAACTTCAATTTTAAATTAAGAGGATCTAGGTGAAGATCCTTTTTGATAATCTCATGACCAAAATCCCTTAACTGAGTTTTCTGTTCCACT
GAGCGTTCAGCCCGTGAAGAAAGTCAAAGGATCTTCTGAGATCCTTTTTCTGCGCGTAATCTGCTGCTTCAAAACAAAAAACCCCGCTACCCG
GGTGGTTTTGTCGGGATCAAGAGTACCAACTCTTTTTCCGAAGTAACTGGCTTCAAGCAGAGCGCAGATACCAAACTGTTCTTCTAGTGTAGCCG
TAGTTAGGCCACCCTTCAAGAACTGTAGCACCGCTACATACCTGCTGCTGCTAATCCTGTACCAGTGGCTGCTGCCAGTGGCGATAAAGTCTGTGTC
TTACCGGGTTGGACTCAAGACGATAGTTACCGGATAAGGCGCAGCGGTGCGGCTGAACCGGGGGGTTCTGTGCACACAGCCAGCTTGAGGCGAACGACCTA
CACCGAACTGAGATACCTACAGCTGAGCTATGAGAAAGCGCCACGCTTCCCGAAGGAGAAAGGCGGACAGGTATCCGGTAAAGCGGACGGGTGCGAAAC
GAGAGCGCACGAGGGAGTCCAGGGGAAACCGCTGTTATCTTTATAGTCTGCGGCTGCGGCTTTCGACCACTTCAAGTGGAGCTGATTTTGTGATGCT
CGTCAAGGGGGCGGAGCTATGAAAAACGCCAGCAACGCGCCCTTTTTACGGTCTGCGCTTTTGTGCGCTTTTGTGCTGCTTCTTCTGCGT
ATCCCTGATTTCTGTGATAACCGTATTACCGCTTTGAGTGTGCTGATACCGCTCGCCGACGCGAACGACCGAGCGACGAGTCAAGTGGAGCGGAA
GCGGAAGAGCGCCAATACGCAAAACCGCTCTCCCGCGCGTGGCGGATTCATTAATGACAGTGGCACGACAGGTTTCCCGACTGGAAGAGCGGGCAGTG
AGCGCAACGCAATTAATGTGAGTGTAGTCACTATTAGGCACCCAGGCTTTACACTTTATGCTTCCGGCTCGTATGTTGTGGAATTTGTGAGCGGATA
ACAAATTCACACAGGAACACAGATGACCATGATTACGCCAAGCTTTTAGTGCACATATAGAATACTCAAGCTATGACCACTCAACGCTTGGGAGCTCT
CCCATATGGTGAAGTACAGCAAGCTGATCTCCTTTGCCCGGAGATCACCATGGACGACTTCTCTATCTCTACGATCTAGGAAGAAAGTTGACGGAG
AAGGTGACGATACCATGTTACCACCGATAAATGAGAAGATTAGCCTCTCAATTTCAAGAAAGATGTGACCCACAGATGGTTAGAGAGGCGCTACCGGGC
AGGTCATCAAGACGATCTACCCGAGTAAATCTCCAGGAGATCAAATACCTTCCCAAGAAAGTTAAAGATGCAAGTCAAAGATTCAGGACTAACTGCG
ATCAAGAACACAGAGAAAGATATATTTCTCAAGATCAGAAGTACTATTCAGTATGGACGATTCAAGGCTTGCTTCAAAACCAAGGCAAGTAAAGAGA
TTGGAGTCTCAAGAAAGTAGTCTCTACTGAATCAAAGGCCATGGAGTCAAATAATCAGATCGAGGATCTAACAGAACTCGCCGTGAAGACTGGCGAACA
GTTATACAGAGTCTTTTACGACTCAATGACAAGAAGAAATCTTGTCAACATGGTGGAGCAGCAGCTCTGCTACTCCAAGAATATCAAAGATACA
GTCTCAGAAGACCAGGGGCTATTGAGACTTTTCAACAAAGGTTAATTCGGGAAACCTCCTCGGATTCATTGCCAGCTATCTGTCACTTCAATCAAAA
GGACAGTAGAAAAGGAAGGTGGCACCTACAATGCCATCATTGCGATAAAGGAAAGGCTATCGTTCAAGATGCCTTCCGCGACAGTGGTCCCAAGATGG
ACCCCGCCACGAGGAGCATCTGGGAAAAGAAAGACGTTCCAAACCGCTTCAAAGCAAGTGGATTGATGTGATATCTCCACTGACGTAAGGGATGAC
GCACAATCCACTATCCTTCGCAAGACCTTCTCTATATAAGGAAGTTCATTTCAATTTGGAGAGGACTCCGGTATTTTACAACAATACCACAACAAAA
CAAAACAACAACAACATTACAATTTACTATTCAGTGCAGCTGACAGGCGCGCACTAGTGATATCAAGTTTGTACAAAAAGCAGGCTTCTATGGGTG
CTCCTCAAAAAAGAGAAAGGTAGGTGGTATGACACAGTTTGAAGGCTTCAACAACTCTTACCAGGTGACGAAGACGCTACGTTTGGAGCTTATCCCG
CAGGGAAAAACCTGAAACACATTCAGGAACAGGGGTTCAATAGAGGAAGATAAAGGCGCGTAACGACCAATTAAGAAGACTGAAGCCTATAATCGACCGT
ATTTATAAAACGTAACGGATCAAGTGCCTGACGCTGGTTCAGCTGGATTGGGAGAATCTGTCCGCGCTATTGATAGCTATCGAAAGAGAAGACCGAGG
AAACCGTAACGCACTGATTGAAGAGCAGGCGACCTATCGGAATGCGATCCATGATTACTTCACTCGCCGACCCGACAACCTGACCGATGCAATTAACAA
ACGTCACGACAGATTTACAAGGCTGTTTAAAGCAGAGTATTCAATGCGAAGGTTCTGAAACAGCTGGTACGGTACCACACCGCAACGAAAAAC
GCAGCTGTGAGGAGCTTTGATAAATTTACCACATATTTAGCGGGTTCTATGAAAACTGAAGAATGATTTAGCGCCGAAGATTTTCCACCGCAATTC
CTACTGATTTGTGACAGGATAATTTCCGAGGTTTAAAGAAATTTGTCATATTTTACCCTGTGATCACCGCGGTACAGGCTGCGAGGACATTTTGA
AAACGTTAAGAAAGCCATTGGAATTTTGTGAGTACGACGATGAAGAAGTGTTCGTTCCCGTCTATAAACCAGTGTGACCCAGACCCAGATTGAT
CTGTACAATCAGCTGTGGGGGCGATAAGCGCGGAGGCGAGTACCGAAAGATAAAGGGACTCAATGAGGTGCTGAATCTGGCAATTCAGAAGAAATGATG
AAACGGCTCATATCATTGCTAGCTGCCGATCGTTTCAATCCCTGTTTAAAGCAATCCTGAGCGATCGCAATACACTGAGCTTTATCCTGAAAGAGTT
TAAATCGGACGAAGAAGTTTACAGAGCTTTTGCAGAGCTTTTGCAGAAATCAAAAACCTGTCGCGGAACGAAAAATGTGCTGGAGACCGCTGAAGACTGTTTAA
TGAAGTGAACCTCGATCGACCTACCCATATTTTATATCCCAAAAAACCTGAAACCATAAAGCAGCGCTCTGTGTGACCATTTGGGATACCTTGGCGAACCCCTGT
ATGAACGGGTATCAGCGAGCTGACCGGAAAAATCACAAATCCGCAAAAGGAAAAAGTTACAGCTAGTCTGAAACAGGAGGACATCAACCTGCAAGAAAT
TATAGCGCAGCAGGTAAGAGAGTGTAGCGAAGCATTCAAACAGAAAAACAGCGAAATCCTGAGCCATGCCCATGCTGCACTGGATCAGCGCTGCCGACC
ACCCTGAAAAAACAGGAGGAAAAAGGAGATTCTGAAAAGCAACTGGACAGCTGCTGGGCTGTATCACCTGCTGGACTGGTTTGCAGTGCATGAGAGCA
ACGAGGTGATCCTGAGTTCTCCGCTGCTGACCGGAATCAAGCTGGAGATGGAACCGAGTCTGTGTTTTACAATAAAGCGCTAATACCGGACCCAA
GAAACCGTATAGCGTGGAAAAATTCAACTGAACCTTCAAGATGCCGACCTTGAAGCGGATGGGACGTTAACAAAGAAAAAAACAAATGGGGCAATTTCTG
TTTTGAAAAATGGCTCTATTATCTGGGTATCATGCGGAAACAGAAAGGGCGCTACAAGCCCTGTCAATTTAGCGCCAGCGAAGAAACCTCAGAGGGTT
TCGACAAGATGTACTACGATATTTCCGGATGCGGCAAAAATGATACCCAAATGTAGCACCAACTGAAGGCGATTACAGCCCACTTTCAGACCCATAC
CACCCAGCTCTGCTGCGAACAATTTATAGAGCGCTGAAAAATCCAAAGAGATTTGATCTGAATAATCCGAAAAAGGAGCCCAAGAAATTTACAG
ACGGGCTATGCAAAAAGACCGGGGATCAGAAAGTTATCGTGAAGCGCTGTGCAAAATGGATTGACTTTACCCGTTACTTGTCAAAAATACAAAAA
CGACGAGCATGATCTGAGCAGCTACGTCGAGCAGCAATATAAGGATCTGGGCAATATTACGCGCAACTGAATCCGCTGCTCTACCATATTTCTTT
CCAACGAATCGTGAAGAAAGAAATAATGGACCGCTTGAACCGGCAAACTGTATCTGTTCAAATCTACAACAAGATTTCGCCAAAGGCCATCAGCGGT
AAGCCGAACCTGCATACCTGTATTGGACCGCTGTTTAGCCCGGAGAACTGGCCAAAACAGCATCAAGCTGAACGGACAGGCGAAGTGTTTTACC
GCCCAAAAAGCGTATGAAAAAGGATGGCACACCGCTGGGCGAAAAAATGCTGAATAAGAAAACTCAAAGATCAGAAAAACCGGATACCCGATACCTTTA
TCAGGAGCTGATGATTATGTTAACCCCGCTGAGCCATGACCTGAGCGACGAAGCGCTGCACTGCTGCCAACGTTGATTACCAAGGAAGTCTGCAT
GAAATATTAAGAGATCGGCGCTTACCACTGATAAATTTTCTTCCATGTACCGATACCCCTGAATATCAAGCCGCAAAATAGCCCTTCCAAATTTAATC
AACCGTGAATGCGTACCTGAAAGAGCATCCGGAGACCCCAATTTAGGATAGACCGAGGAGAACGCAATCTATTATATCACCGTCAATGATAGCAC
CGGTAAGATCTGGAACAGCTAGCTGAATACCATTCAGCAGTTTACTACAGAAAAAGCTGGACAACAGAGAAAAAGGAACGTGTAGCCGCCCGGACG
```

GCTTGGAGTGTGGTGGGTACTATCAAGGATCTGAAGCAGGGGTATCTCTCCAAGTATCCATGAAATTGTCGATCTAATGATTCACTATCAAGCAGTAG  
TGGTACTGGAATAATCGAATTTCCGTTTCAAAGCAAACGTACAGGGATCGCTGAAAAAGCCGTTTATCAGCAGTTCGAGAAAAATGCTGATAGACAAGCT  
GAATTCGCTGGTTCTGAAAGATATCCGGCAGAGAAGGTGGGCGGTGTGCTGAACCCGTACCAGTACTGATCAATTTACGAGCTTGCAAAAAATGGGA  
ACGCAGAGCGGTTTTCTGTCTAGTTCGCGGCCATATACCCAGTAAGGGAAATTAGGGTCTTATAGGGTTTCGATAGTCCGTTTGTCTGGAAAAACCATTA  
ATCATGAAAGTCGCAACATTTCTGGAGGGCTTTGATTTTTCGCACTATGACGTGAAAACCGGCACTTCACTTCTGCATTTTAAATGAACCGTAATCT  
GTCCTTTCAGCGCGGCTGCTGCTGCTTATGCCGCGTGGGACATGTTTTGAAAAGAAATGAGACACAGTTTGATGCCAAAGGTACCCCTTTATTGCG  
GGGAAACGCATGTGCCGTTATAGAAAAACCCGCTTACCAGGCGGATAGGGACTTGTACCCGCAAAATGAATGATAGCGTGTGGAGGAGAAAAG  
GTATTGCTTTCGGGATGGATCAACATCTGCCGAAGCTGCTGGAGAAGCATGACAGCCACGCAATAGACACCATGGTAGCGTGTCCGAAGCGTGT  
GCAGATGCGTAACAGTAATGCGGCTACGGGGGAAGACTACATTAATAGCCGGTCCGATCTGAACGGCGTTTGTTCGATAGCAGATTTCAAATCCG  
GAGTGGCCGATGGATGCCGATGCCAATGGAGCTTACCATATGCTCTCAAAGTCTGAGTCTTACTGAACCATTTGAAAGAATCAAAGATCTGAAATGCG  
AGAACGGCATCTCGAATCAGGACTGGCTGGCTTACATTAAGAAGTGAAGAAACCAAAGAAAAAGAAAAAGTAGGTGGTTACCCCTACGACGTGCCCGA  
CTACGGCTAAACCCAGCTTCTTGTACAAAGTGGTATATCCCGCGCCATGCTAGAGTCCGCAAAAAATCACCAGTCTCTCTCAAAATCTATCTCT  
TCTATTTTTCCAGAAATAATGTGTGAGTAGTTCCAGATAGGGAAATTAGGGTCTTATAGGGTTTCGCTCATGTGTTGAGCATATAAGAAACCTTAG  
TATGTATTTGATTTGTAATAATCTCTATCAATAAAATTTCTAATCTCTAAAACCAAATCCAGTACCTGACGAGCATGCGAGCTGCGGCCAAATTCGC  
CCTATAGTGAAGTCTATACAATCACTGGCCGTCGTTTTACAACGTCGTACTGGGAAAAACCTGGCGTTACCAACTTAATCGCTTGCAGCACATCC  
CCCTTCGCCAGCT

p2GW7-eLbCpf1-HA, *E. coli*-codon optimized LbCpf1.

Amp-R35s promoter 5' NLS eLbCpf1 3' NLS HA Stop codon 35s terminator

GGCGTAATAGCGAAGAGGCCCGCACCAGTCCGCTTCCCAACAGTTCGCGAGCCTGAATGGCGAATGGACGCGCCCTGTAGCGGCGCATTAAGCGCGGG  
GGTGTGGTGTACGCGCAGCGTACCCTACACTTGCAGCGCCATAGCGCCGCTCTTTCGCTTTCCTTTCGCGCACGTTCCGCGGCT  
TTCCCGTCAAGCTTAAATCGGGGCTCCCTTAGGGTCCGATTTAGTCTTACGGCACCTCGACCCAAAAAATGATAGGGTGTAGGTTACAG  
TAGTGGGCCATCGCCCTGATAGAGGGTTTTGCGCCCTTACGCTTGGAGTCCAGCTTCTTAATAGTGGACTCTTGTCCAAACTGGAAACAACACTCAAC  
CCTATCTCGTCTATCTTTGATTTATAAGGGATTTGCGGATTTGCGCCTATTGGTTAAAAAATGAGCTGATTTAACAAAAATTAACGCGAATTTTA  
ACAAAAATTAACGCTTACAATTTCTGATCGGATTTTCTCCTACGCATCTGTGCGGTATTTACACCGCATCAGGTGGCATTTCGGGAAATGT  
GCGCGAACCCTTATTTGTTTTCTAAATACATTTCAAATATGATCCGCTCATGAGACAATAACCCTGATAAATGCTTCAATAATATTGAAAAAGG  
AAGAGTATGAGTATTAACATTTCCGTGTCGCCCTTATCCCTTTTTGCGGCTTTGCTTCTGTTTTTGCTCACCCAGAAACGCTGGTGAAGTAA  
AAGATGCTGAAGATCAGTTGGGTGCACGAGTGGGTTACATCGAAGTGGATCTCAACAGCGGTAAAGATCCTTGAGAGTTTTCCGCCGAAAGAACGTTTTCC  
AATGATGAGCACTTTAAAGTTTCTGATGTGGCGCGGATTTACCCGATTTGACGCGGGCAAGAGCAACTCGGTCGCCGATACACTATTCAGAAAT  
GACTTGGTTGAGTACTCACAGTACAGAAAAAGCATCTTACGGATGGCATGACAGTAAAGAAATATGCAAGTGGTGCATAAACCATGAGTGAACACTG  
CGGCCAACTACTTTCGACAACGATCGGAGGACCGAAGGAGTAAACCGCTTTTTGACAACATGGGGGATCATGTAACCTCGCTTGTGTTGGAAACC  
GGAGCTGAATGAAGCATACCAAACGACGAGCGTACACACGATGCTGTAGCAATGGCAACACGTTGCGCAAACTATAACTGGCGAACTACTTACT  
CTAGCTTCCCGCAACAATTAATAGACTGGATGGAGGCGGATAAAGTTGACAGGACCACTTCTGCGCTCGGCCCTTCCGGTGGCTGGTTATTGCTGATA  
AATCTGGAGCCGTTGAGCGTGGTCTCGCGTATCATTGCAGCACTGGGCGAGATGGTAAGCCCTCCGATCGTAGTATCTACACGACGGGAGTCA  
GGCAACTATGGATGAACGAAATAGACAGATCGCTGAGATAGGTGACTACCGCTGACGATTAAGCATTTGTAAGTTCGCGCAGCCGAACGACCGAGCGAGTCA  
ATTGATTTAAAAATTCATTTTAATTTAAAGGATCTAGGTGAAGATCCTTTTTGATAATCTCATGACCAAAATCCCTAACGTGAGTTTTGTTCCACT  
GAGCGTCAGACCCGATAGAAAAGATCAAAGGATCTTCTGAGATCCTTTTTTCTGCGGTAATCTGCTGCTTGCACAAAAAACCACCGCTACCAGC  
GGTGGTTTTGTTGCGGGATCAAGAGCTACCAACTCTTTTTCCGAAGTAACTGGCTTACGAGAGCGCAGATACCAAACTACTGTTCTTAGTGTAGCCG  
GATTAGCCACCACTCTGAGCAACTCTGTAGCACCGCTACATACCTCGCTGCTAATCCTGTTACCAGTGGCTGCGCAGTGGCGAAATGAGTCAAGCTG  
TTACCGGTTGGACTCAAGACGATAGTTACCGGATAAGGCGCAGCGGTGCGGCTGAACGGGGGTTGCTGCACACAGCCAGCTTGGAGCGAACGACCTA  
CACGAACTGAGATACCTACAGCGTGTAGCTATGAGAAAGCGCACGCTTCCGAAAGGAGAAAGGCGGACAGGTATCCGGTAAGCGGCGAGGTCGAAACA  
GGAGAGCGCACGAGGGAGCTTCCAGGGGAAACGCTGATCTTTATAGTCTGTGCGGTTTCCGACCTTGAAGTGTGAGCGTCAATTTTGTGATGCT  
CGTCAAGGGGGCGGAGCTATGAAAAACGCCAGCAACGCGGCTTTTTACGGTCTTGGCTTTTTGCTGGCTTTTGTCCATATGTTCTTCCGCTGCT  
ATCCCTGATTTCTGTGGATAACCGTATTACCGCTTTGAGTGAAGTACTTCTGCTGACCGCTGCGCGACCCGAACGACCGAGCGAGTCAAGTGAAGCGAGGAA  
GCGGAAAGAGCGCCAATACGCAAAACCGCTCTCCCGCGCTTGGCGGATTCATTAATGACGCTGGCACGACAGGTTTCCGACTGAAAGCGGGCAGTG  
AGCGCAACGCAATTAATGTGAGTTAGCTCACTATTAGGACCCAGGCTTTACACTTTATGCTTCCGGCTCGTATGTTGTGGAATTTGAGCGGATA  
ACAATTTACACAGGAAACAGCTATGACCATGATTACGCCAAGTATTTAGGTGACACTATAGAATACTCAAGCTATGCATCAACGCTTGGGAGCTCT  
CCCATATGGTCTGACTAGAGCCCAAGTCTCTCTTTGCCCGGAGTACCATGACGACTTTCTCTATCTACGATAGAGAAAGTTCGACGGGAG  
AAGGTGACGATACCATGTTACCACCGATAATGAGAAGTTAGCCTCTCAATTTCAAGAAAGATGCTGACCCACAGATGGTTAGAGAGGCTACGCGGC  
AGGTCTCATCAAGACGATCTACCCGAGTAAATATCTCCAGGAGATCAAACTCTCCAAAGAGGTTAAAGATGCAAGTCAAAGATTCAGGACTAACTGC  
ATCAAGAACACAGAGAAAGATATATTTCTCAAGATCAGAAGTACTTTCCAGTATGGAGCATTCAAGGCTTGTCTATAAACCAAGGCAAGTAATAGAGA  
TTGGAGTCTCTAAGAAAGTCTCTACTGATCAAAGGCCATGGATCAAAATTCAGATCGAGGATCTAACAGAACTCCGCTGGAAGACTGGCGAACA  
GTTCTACAGAGTCTTACGACTCAATGACAAGAAGAAATCTTCTGCAACTGTTGAGGAGGAGCAGCAGCACTCTGCTACTCCAAAGATATCAAAGATACA  
GTCTCAGAAGACCAAGGGCTATTGAGACTTTCAACAAAGGTAATATCGGAAACCTCTCGGATTCATTGCCAGCTATCTGTCACTTCAATCAAAA  
GGACAGTAGAAAAGGAAGGTGGCACCTACAAATGCCATATTGCGATAAAGGAAAGGCTATCGTTCAAGATGCCTTCCGCGACAGTGGTCCAAAGATGG  
ACCCCAACCCAGGAGGATCGTGGAAAAAGAGACGTTCAACACGCTTCAAAGCAAGTGGATGATGATATCTCCACTGACGTAAAGGGATGAC  
GCACAATCCCACTATCCTTCCGAAGACCTCTCTATATAAGGAAAGTTCATTTCAATTTGGAGAGGACTCCGGTATTTTTACAACAATAGCCAAACAAA  
CAAACAACAAACATTAACAATTACTATCTAGTTCGACTGACGCGGCGCACTAGTGATATACAAGTTTGTACAAAAAGCAGGCTTCTATGGTGT  
CTCCTCCAAAAAGAAAGAAAGGTAAGTGGTATGAGCAAACTGAAAAATTTACGAATTTGATAGCTGTCCAAGACCCTGCTTTCAAAGCCATCCCG  
CGTGGCAAAACCCAGGAGAATATTGATAATAAACGCTGCTGTTGAGGATGAAAAAAGAGCAGAAAGCTATAAGGGAGTCAAAAAATGCTGGAATCGG  
TACTACTGAGCTTTATAATGACGTGCTGCATAGCATTAACATGAAAAATCTGAATAACTATATTAGTCTGTTCCGCAAGAAAAACCCGAAAGAGAAAG  
AAAAATAAGAGCTGGAAAACCTGGAGATCAATCTCGTAAGAGATCGCAAAAGCTTTTAAAGGAAATGAAGGTTATAAAAAAGGATTTCAAAGAAAGCAT  
TATTGAAACCATCTGCCGAATTTCTGGATGATAAAGACGAGATAGCGCTGTGAACAGCTTCAACGGGTTACAGCCGCTTACCGGGCTTTTCGAT  
AACAGGAAAAATATGTTTTAGAGGAAGCCAAAGACCTCGATAGCGTCCGTTGCAATTAATGAAAAATTTGACAAGATATATCAGCAACATGGATATTT  
TCGAGAAAGTTGATGCGATTTTGAACAACATGAAGTGCAGGAGATTAAGGAAAAAATTTGAAACAGCATTATGATGTTGAGGATTTTTTCGAGGGGGA  
ATTTTTAACTTTGACTGACACAGGAAAGGTATAGTGTGATATAGTACTTATACGGCGGGTTCGTTACCGAATCCGGCAGAAAAATTAAGGGTCTGAGT  
GAGTACATCAATCTGATAACCAAAAGACCAACAGAAATGCCAAAAATCAAACCGCTGTACAAGCAAGTCTGAGCGATCGGAAAGCTTGAAGCTTTT  
ACGGTGAAGTTATACCAGCAGCAGGAGGACTGGAGGCTTTTCGCAATACCTGAAACAGAACAGCGAAATTTGAGTCCATTAAGAAAGCTGGAGAA  
ACTGTTAAGAAATTTGACGAGTACAGCAGCGAGGATTTTTGTTGAAGAAGCGACGTCGCAATAGCACCATTAGCAAGGATATTTTGGAGAGTGGAAAT  
GTTATCCGATGATAAATGGAACCGGAATATGATGACATACCTGAAAAAGAGGCTGGTGAAGTGAAGAAATGAAGACGATCGCCGCAAAAGCTTTA  
AAAAAATCGGACGCTTTAGCTGGAGCAGTGCAGGAATATCGGACGCGGACCTGAGCGTGGTGCAGAAACTGAAGGAAATTTATTAACAAGAAATGGGA  
TGAGATTTACAAGGATATGTTAGCAGCGAAAAACTGTTGATGCGGACTTCGTTCTGGAAAAAGCCTGAAAAAATGATGCTGTTGTTGCGATCATG  
AAAGACCTGCTCGATAGCGTTAAGAGCTTTGAAATTAACATTAAGCATCTTTGGCGAGGGCAAGAAAAACAACAGAGACGAAAGCTTTTATGGCGACT

TCGCTCTGGCTTATGACATCTGTGAAGGTAGATCATATATATGATGCAATTTCGTAATACGTAACCCAAAAGCCGTACAGCAAAGATAAGTTCAAAC  
GTATTTCCAGAACCCGAGTTTATGGGTGGCTGGGACAAAGACAAAGGAGACAGACTATCGCGCCACTATTCTGCTTACGGCAGCAAGTACTATCTCGCC  
ATCATGGACAAAATAATGCAAGGTCTGCGAGAAATCGATAAAGACGACGTGAACGGAAATACGAAAAGATTAATATAAGCTGTGCCAGGGCCCA  
ACAAGATGTTCCAGAAATGTTTTTCCAAAATAATGGATGGCATACTATAACCCGAGCGAGGATATACAGAAGATTTCACAAAATGGGACCTCAAAA  
GGGGGATATGTTCAATCTGAATGACTGCCAAAATGATCGATTTTTTAAAGATAGCATCAGCCGTTATCTAAATGGTCAAACGCTATGATTTTAA  
TTCTCGAAACGAGAAATATAAAGACATTCGTTGTTTCTATCGCAAGTGAAGAACAGGGTTATAAAGTAGCTTTGAATCGCCAGCAAGAAAGAGG  
TTGATAAACGTTGGAGGAGGGTAAGCTGTATATGTTTCAAGTTTATAACAAGACTTTAGCGACAAAAGCCACGGTACTCTAATCTGCATACGATGTA  
CTTTAACTGCTGTTTGTAGAGATAACACGGCCAAATCCGTCCTCCGGTGGAGCAGAACTTTTATCGCCGCTGCGAGCTAAAAAGGAAGAACTG  
GTGGTGCATCCGCCAACAGCCGATGCTAACAAAATCCAGATAATCTTAAGAAGACCACACTGTCTGATGATGCTATAAAGGATAAACGTTTTCT  
CGGAAGACCAGTATGAATGTCATATACCGATAGCAATTAATAATGCCAAAACATTTTCAAAAACAACACTGAAGTTCGTGTGCTGCTGAAACATGA  
TGATAATCCGATGATGATCGGAATTGACCGTGGGGAGAGAAATCTGCTGTATATTTAGTCTGTTGATGGCAAGGGCAACATCGTTGAGCAGTATAGCC  
AATGAAATAATTAATAATTTAACGGTATACGTATTAACACCGACTATCATAGCTGCTGGATAAAAAGGAGAAAGAGCGTTTTGAGGCACGCCAAAAT  
GGACGAGCATCGAAAACATCAAGGAATGAAGGACAGGATATATCAGCCAAAGTACTATAAATCTGTGAATGGTGAAGAATACGACGCTGCTTATG  
CCTGGAAGACCTCAATAGCGCTTTAAAACAGCCGGGTGAAGGTGGAGAACAGGTATACAAAAGTTGAAAAGATGCTCATGATAAGCTGAACAT  
ATGGTTGATAAAAAGAGCAACCCGTGCGCCACTGGCGGTGCATGAAAGGGTACCAAAATACCAATAAATTTGAAAAGCTTTAAAAGCATGAGCAGCAGA  
ATGGGTTATTTTTATATACAGCATGGCTGACGAGCAAGATTGACCCAGCACTGGTTTTGTCATCTGCTGAAAACCAATACACAAGCATTGCGGA  
TAGCAAAAATTTATTTTCGAGCTTCGACCGTATTAATGATGTTCCGGAGGAAGTCTGTTGAAATTTGCCCTGGATTAAAAAATTCAGCCGACCCGAT  
CGAGTTATATAAAAAATGGAAGCTGTACAGTTATGGTAATCGTATACGTATCTTCGTAATCCGAAGAAAAACAATGTGTTTCGATTGGGAAGAGGCT  
GTCTGACCAGCGCTATAAAGAACTGTTCAACAAGTACGGAATAAATATCAGCAAGGTGACATTCGCGCACTGCTGTGTGAACAGTCAATAAAGCATT  
TTATAGCAGCTTTATGCGCTGTAGGCTGTGCTCCAGATGCGCAACAGCATAAACCGGTGCGACAGATGTTGACTTTCTGATCAGCCCTGTGAAGAA  
AGCGACGGCATCTTACGATCCAGGAACTGAAGCACAGGAAAACGCTATTCTGCCTAAAAATGCCGATGCCAACGGCCCTATAATATTCAGCGGA  
AGGTTCTGTGGCGGATTGGACGATTCAAGAAAAGCGGAAGATGAGAAAGTGGTAAAGGTAAGGTAAGGTAAGGTAAGGTAAGGTAAGGTAAGGTAAGG  
GACATCGGTTAAACACCAAAGAAAAGAGAAAAGTAGGTTGTTACCCTACGACGTTGCCGACTACGCCTAACACCCAGCTTTCTGTACAAAGTGGTG  
ATATCCCGGGCCATGCTAGAGTCCGCAAAAATCACCAGTCTCTCTACAAATCTATCTCTCTATTTTTCTCAGATAATGTGTGAGTAGTCCCA  
GATAAGGGAAATAGGGTTCTTATAGGGTTTCGCTCATGTGTTGAGCATATAAGAAACCTTAGTATGATTTGTAATTTGTAATAAATCTTCTATCAATAA  
ATTTCTAATTCCTAAAACCAAAATCCAGTGACCTGCAGGCATGCGACGTCGGGCCAATTCGCCCTATAGTGAGTGTATTACAATTAAGTGGCCGCTG  
TTTACAACGCTGTGACTGGGAAAACCTGGCGTTACCAACTTAATCGCCTTGACGACATCCCCCTTTCGCCAGCT

p2GW7-AsCpf1-HA, plant-codon-optimized AsCpf1.

Amp-R35s promoter<sup>5'</sup> NLS pAsCpf1<sup>3'</sup> NLS HA Stop codon<sup>35s</sup> terminator

GGCGTAATAGCGAAGAGGCGCGCACCGATCGCCCTTCCAAACAGTTGCGCAGCCTGAATGGCGAATGGACGCGCCCTGTAGCGGGCATTAAAGCGGGCG  
GGTGTGGTGGTTACGCGCAGCGTGACCGCTACACTTGCACGCGCCCTAGCGCCGCTCCTTTCGCTTCTTCCCTTCCCTTCTCGCCACGTTGCGCGGCT  
TTCCCGTCAAGCTCTAAATCGGGGGCTCCCTTTAGGGTTCCGATTTAGTGCCTTACGGCACCTCGACCCCAAAAAATGATTAGGGTGATGGTTACAG  
TAGTGGGCTCAGCCCTGATAGCGGTTTTTCGCCCTTGACGTTGGAGTCCACGTTCTTAAATAGTGGACTTTGTTCAAACTGGAACAACACTCAAC  
CTATCTCGGCTTATCTTTTGTATTATAAGGGATTTTCCGATTTCCGCTATTGGTTAAAAAATGAGTGTATTAAACAAAATTTAACCGGAATTTTA  
ACAAAATATAACGCTTACAATTTCTGATGCGGATTTTTCTCTTACGCATCTGTGCGGATTTACACCCGATCAGGTGGCACTTTTCGGGAAATGT  
GCGCGGAACCCCTATTTGTTATTTTTCTAAATACATTCAAATATGATCCGCTCATGAGACAATAACCCTGATAAATGCTTCAATAATATTGAAAAGG  
AAGAGTATGAGTATTAACATTTCCGTGTCGCCCTTATCCCTTTTTGCGGCATTTTGCTTCTCTGTTTTGCTCACCCAGAAACGCTGGTGAAGTAA  
AAGATGCTGAAGATCAGTTGGGTGACGAGTGGGTTACATCGAATGCTTCTTACAGGATCCTTTTTTTCGCGGTAATCTGCTGTTGCAAAACAAAAGGCAAGT  
AATGATGAGCACTTTAAAGTTTCTGCTATGTGGCGCGGATTTACCGGATTTGACGCGGGGCAAGAGCAACTCGGTGCGCCGATACACTATTCTCAGAAT  
GACTTGGTTGAGTACTACCAGTACAGAAAAGCATCTACGGATGGCATGACAGTAAGAGAATTATGCAAGTGTGCATAAACATGAGTGATAAAGTACTG  
CGCCAACTTACTTCTGACAACGATCGGAGGACCGAAGGAGTAAACCGCTTTTTGCAACAACATGGGGGATCATGTAACCTGCTGATCGTTGGGAAC  
GGAGTGAATGAAGCCATACCAAACGACGAGCGTGACACCAGATGCTGTAGCAATGGCAACACGTTGCGCAACTATTAACGGGAACTACTTACT  
CTAGCTTCCCGGCAACAAATTAATAGACTGGATGGAGGCGGATAAAGTTGACGAGCACTTCTGCGCTCGGCCCTTCCGGTGGTGGTTATTGATGATA  
AATCTGGAGCCGGTGAAGCGTGGGTTCTGCGGATCATTGCAGCACTGGGGCAGATGGTAAGCCCTCCGCTATCGTAGTTATCTACACGACGGGGAGTCA  
GGCAACTATGGATGAACGAAATAGACAGATCGCTGAGATAGGTGCTTCACTGATTAAGCAATGGTAACTGTGAGCAAGTTTACTCATATATACTTTAG  
ATTGATTTAAAATCTATTTTTAATTTAAAAGGATCTAGGTGAAGATCCTTTTTGATAATCTCATGACCAAAATCCCTTAACGTGAGTTTTGTTCCACT  
GAGCGTCAGAACCCGTAGAAAAGTCAAAGGATCTTCTGAGATCCTTTTTTTCGCGGTAATCTGCTGTTGCAAAACAAAAGGCAAGTAAAGTAAAGC  
GGTGGTTTTGTTGCCGGATCAAGAGCTACCAACTCTTTTTCCGAAGGTAACCTGGCTTACGAGAGCGCAGATACCAAATACTGTTCTTCTAGTGTAGCCG  
TAGTTAGCCACCCTCAAGAACCTGTAGCACCGCTACATACCTGCTGCTGTAATCTGTTACCAGTGGCTGCTGCCAGTGGCGATAAGTCTGTGTC  
TTACCGGGTTGACTCAAGACGATAGTTACCGGATAAGGCGACGCGTGGGCTGAACGGGGGGTTCGTGCACACAGCCAGCTTGGAGCGAACGACCTA  
CACGAACTGAGTACCTACAGCTGAGCTATGAGAAAAGCGCCAGCTTCCGGAAGGAGAAAGGCGGACAGGTATCCGGTAAGCGGCAGGGTCCGAAACA  
GAGAGCGCACGAGGGCAGCTTCAAGGGGAAACCGCTGGTATCTTTATAGTCTGTTGCGGTTTTGCGGCTTCCGCTGAGCTTCCGCTGTTTGTGATGCT  
CGTCAAGGGGGCGGAGCTATGAAAAACGCCAGCAACCGGCCCTTTTTACGGTTCTGGCCTTTTGTGCTTCTTCTCACATGTTCTTCTCGCT  
ATCCCTGATTTCTGTGATAACCGTATTACCGCTTTGAGTGAAGTGTACCGCTCGCCGACGCCAAGCAGCCGAGCGAGTCAAGTGAAGCGAGGAA  
GCGGAAGAGCGCCCAATACGCAAAACCGCTCTCCCGCGCTTGGCGATTCAATTAATGCAAGTGGCAGCAGAGGTTCCCGACTGGAAGCGGGCAGT  
AGCGCAACGCAATTAATGTGAGTTAGCTCACTCATTAGGCACCCAGGCTTACACTTTATGCTTCCGGCTCGTATGTTGTGGAATTTGAGCGGATA  
ACAATTTACACAGGAAACAGCTATGACCATGATTACGCAAGCTATTTAGGTGACACTATAGAATACTCAAGCTATGATCAACCGCTTGGAGCTCT  
CCCATATGGTCTGACTAGAGCCAGCTGATCTCCTTTGCCCGGAGATCACCATGGACGACTTTCTCTATCTCTACGATCTAGGAAGAAAGTTGACGGAG  
AAGGTGACGATACCATGTTACCACCGATAATGAGAAGTTAGCCTCTCAATTTCAAGAAAGATGCTGACCCACAGATGGTTAGAGAGGCTTACCGGCG  
AGGCTCATCAAGACGATCTACCGAGTAAATCTCCAGGAGTCAAATACCTTCCAAAGAGGTTAAAGATGCAAGTCAAAGATTCAGGACTAAGTCTG  
ATCAAGAACACAGAGAAGATATATTTCTCAAGATCAGAAGTACTTTTCCAGTATGGACGATTCAAGGCTTGGTTCAAAACAAAAGGCAAGTAAAGTAA  
TTGGAGTCTCAAGAAAGTAGTTCTACTGAAATCAAAGGCCATGGAGTCAAAAATTCAGATCGAGGATCTAACAGAATCGCCGTTGAAGACTGGCGAACA  
GTTCATACAGAGTCTTTTACGACTCAATGACAAGAAGAAAATCTTCGTCACATGGTGGAGCAGCACTCTGCTACTCAAGAAATATAAAGATACAA  
GTCTCAGAAGACCAAGGGCTATTGAGACTTTTCAACAAGGGTAAATCGGGAACCTCTCGGATTCATTGCCAGCTATCTGCTACTTCAATCAAAA  
GGCAGTGAAGAAAGGAAAGTATATTTCTCAAGTACCAAAATGCCATCTTGGCATAAAGGAAAGGCTATCGTTCAAGTGCCTCGCCAGGAGTGGTCCCAAGATGG  
ACCCCAACCCAGGAGGATCGTGGAAAAGAGAGCTTCAACACGCTCTTCAAGCAAGTGGATGATGATGATCTCCACTGACGTAAGGGATGAC  
GCACAATCCACTATCCTTCGAAGACCTTCTCTATATAAGGAAGTTCATTTCAATTTGGAGAGGACTCCGGTATTTTACAACAATACCACAACAAA  
CAAACAACAACAACATTACAATTTACTATCTAGTGAAGCTGACGCGGCGCACTAGTGATATCAAGTTTGTACAAAAGAGCAGGCTTCTAGGCC  
CAAAGAAGAAGCGGAAGGTCGGTATCCACGGAGTCCAGCAGCCATGACTCAGTTGAGGGCTTACCAATCTCTACAGGTTAGTAAGACGCTAAGAT  
TGAGCTTAATCCCGCAAGGAAAGACTCAAAAACATTTCAAGAACAAGGGTCAATAGAGGAGGATAAGGCGAAGAAATGACCTTATAAAGAACTGAAGCT  
ATAATGACCGTATTTATAAAAACATACCGGATCAGTGTCTACAAGTGGTCAACTGGATTGGGAGAACCTGTCGCGGCTATTGATAGCTATAGAAG  
AGAAGACTGAGGAAACAAGGAATGCTCTGATTGAGGAGCAAGCTACCTACCGAACCGCATCATGATTACTTCAATCGGTAGAACGACAACTGACTGA

TGCAATCAACAAGAGACACGCAGAGATTTACAAAGGTTTGTTC AAGGCAGAGTTATTC AACGGCAAGTTCTCAACAGCTGGGTACGGTCACCACAAC  
GAGCATGAGAACGCTCTGCTGAGAAGCTTTGATAAGTTTACAACATATTTCTCAGGTTCTATGAGAATCGTAAGAAATGTATTTAGCGCTGAAGATATAT  
CAACAGCTATCCACATAGGATGTGTCAGGATAAATTTCCAAAGTTCAAAGAAAATGTGCATATTTTACACGCTGATCACCGCCGTACCCTCGTGC  
AGAGCATTTCCAGAACGTTAAGAAAGCCATAGGAATTTTGTGTCAGTACATCAATTAAGGAAAGTGTTCGTTCCATTCTAATACCAGCTGTCCAGCAG  
ACCCAGATTGATCTCTACAATCAGTTGCTCGGTGGAATAAGCCGCGAGGCAGTACTGAAAAGATAAAGGGACTCAACGAGGTACTGAATCTGGCAATTC  
AAAAAAATGATGAAACGGCTCATATAATGTCTAGCCTGCCACATAGATTTCATACCCTGTTTAAAGCAAATCTGAGCGATAGAAAATACACTGAGCTTTAT  
CTTGGAGGAGTTTAAAGTCGGACGAGGAGGTATCCAAATCTTTTGCAAGTACAAAACCTCTCTCGCGAACGAGAAATGTGCTGGAGACAGCTGAAGCACTG  
TTTAATGAACTGAACTCAATCGATCTCACTCATATCTTTATATCCATAAGAACTGGAGACCATAAGCAGCGCTCTGTGTGATCACTGGGATACGCTGA  
GGAACGCCCTGTATGAAAGCAGTATTAGCGAGCTGACCGGGAAAATCACGAAGTCCGCTAAGGAAAAAGTTTCAGAGGAGCTAAAAACACGAGGACATCAA  
CCTGCAAGAAATATTAGCGCTGCAGGAAAGGAGCTGAGCGAGGCTTCAAGCAAAAGACCAGGAAATCTTGAGCCATGCCATGCTGCGCTGGATCAA  
CCTCTGCCTACAACCTGAAGAAGCAGGAGGAGAAGGAAATCTGAAATCTCAGCTGGACTCACTGCTGGCCCTGTATCACCTTCTTGATTTGTTTGCCTG  
TCGATGAGAGCAACGAGGTTGATCTGAGTTCCTCGCTGACTGACCGGAATCAAGCTGGAGATGGAGCCTAGTCTGAGTTCTATAATAAGCTCGAAA  
CTACGCAACAAAAAACCTGACTCTGTGGAAAAATCAAATCTGAAATTCGCAACGCTCGCAAGTGGATGGGACGTTAATAAGGAAAAAGAAATAAC  
GGGGCCATTCTGTTCGTGAAAAATGGACTCTATTATCTGGGTATCATGCCGAAACAAAAGGGGAGGTACAAGGCCCTTTCATTGAGCCTACTGAGAAAA  
CCTCAGAGGGTTTCGACAAGATGACTACGATATTTTCTGACGCTGCAAAAATGATACCCAAAGTGTCAACTCACTGAAAAGCTGTTACAGCGCACTT  
TCAGACTCACACCACCCCTATCTCTCTCGAACAATTTTATAGAGCCACTGGAATTAATAAGAGATTTATGATCTGAATAATCCGAAAAAGGAGGCC  
AAGAAGTTCAGACAGCTTACGCAAAAAAACCGGGACCGAAGGGTTATCGTGAAGCACTATGCAAGTGGATTGACTTTACCAGGCACTTTCTGTCAA  
AATATACAAAACTACATCTGATTTGTCAAGCTAAGGC CAAGCTCAATACAGGATCTGGGTGAATACTACGCGAACTGAAACCCGCTTCTGTAT  
CCATATCTCTTCCAGCGAATAGCTGAAAAAGAAATCATGGATGCTGTGAAACTGGGAAACTGTATCTGTTCAAATCTATAATAAGGATTTTGTCAA  
GGGCATCACGGTAAGCCTAACTTGATACCCCTGACTGGACTGGTCTTTTCAAGTCTGAGAATCTGCTAAGACATCTATCAAGCTGAATGGACAGGCAG  
AAGTGTTCACAGCCAAAAGCCGAATGAAAAGGATGGCACACAGACTGGGAGAGAAGATGCTGAACAAGAAGCTCAAGGATCAAAAACTCCGATCCC  
AGATACTTTGATATCAAGAGCTGTATGATTACGTTAACCCACAGACTGACCCATGATTTGAGTGACGAAGCTAGGGCACTACTGCCGCAAGCTGATACGAAG  
GAGGTCTCGCATGAAATATTAAAGATCGGCGCTTACATCTGATAAGTTTCTTCCATGTACCTATTACACTGAATACCAAGCCGCAAAATCACCTT  
CCAAATTTAATCAAGAGTGAATGCGTATCTAAAAGAACATCCAGAGACTCCAATATTGGAATAGATCGAGGAGAGAGAAATCTCATTACATCACGGT  
CATCGATAGCACAGGTAAGATCTCGGAACAGCGTCTCTTAATACAATTCAGCAATTTGATTACCAGAAGAAGCTAGACAACAGAGAAAAGGAGAGGGTA  
GCTGCACGGCAAGCTGGAGTGTGTGGTACTATCAAGGATCGAAGCAGGATATTTATCCCAAGTTATACATGAAATAGTGCACCTCATGATACACT  
ACCAAGCTGTGGTGGTACTCGAGAATCTGAATTTCCGTTTCAAAGCAACGACTGGGATCGCTGAAAAAGCCGTTTATCAGCAGTTTGAGAAAAATGCT  
GATAGACAAGCTTAATTTGCTGGTTCTGAAAGATTATCCAGCAGAGAAGTTGGAGGTGTGCTGAACCTTACCAACTGACTGATCAATTCACGCTTTTT  
GCAAAAATGGGCACGAGAGTGGTTTCTGTTTATGTTCTGACCATATACCTCTAAAATAGACCTCTGACAGGATTCGTAGATCCTTTTGTCTGGA  
AAACCATTAAGAATACGAAAGTAGAAAACATTTCTGGAGGGCTTTGACTTCTGCACCTACGATGTTAAGACTGGCGATTCATTCTGCATTCAAGAT  
GAACCGTAATCTCTCTTCAACGCGGATTTGCTGGCTTTATGCGCGGCTGAGGATATTGTTTGGAAAAAGATGAGACACAATGATGCAAGGGTACCC  
CCATTATCGCGGAAAAAGAAATGTGCCCTTATCGAAAACACAGATTCACTGGACGGTATAGGGACTTATACCTGCGAACGAATGATAGCTCTCC  
TGGAGGAGAAAGGATTTGCTTTAGGGACGGATCAAACATCTCTCTAACTGCTGAGAACGATGACTCACACGCTATAGATACCATGGTTGCTTTGAT  
CCGAAGCGTGTCCAGATGCGTAACCTAATGCGGCTACGGGGGAGGACTACATAAATAGCCAGTCCGTGATCTGAACGGCGTGTGTTCTGACTCAAGA  
TTCCAAAATCTGAATGGCCAATGGATGCCGATGCCAATGGAGCTTACCATCGCTCTCAAAGTCAACTCTACTAAACCATTTGAAGGAGTCAAAG  
ATCTGAAGCTCCAGAACGGAATCTCGAACCGAGGATTGGTTGGCTTATATTCAGAGCTGAGAAAACAAAAGGCCGGCCGACGAAAAAGCCGCGCAGGC  
AAAAAGAAAAAGGGATCTTACCATACGATGTTCCAGATTACGCTTATCCCTACGACGTGCCTGATTTATGCAATACCCATATGATGTCCCGACTATGCC  
TAAACACCCAGCTTTCTGTACAAAGTGGTGATATCCCGGGCCATGCTAGAGTCCGCAAAAATCACCAGTCTCTCTCTACAATCTATCTCTCTCTATTT  
TTCTCCAGATAATGTGTGAGTAGTTCACAGATAAGGGAATTAGGGTCTTATAGGGTTTCGCTCATGTGTTGAGCATATAAGAAACCCTTAGTATGAT  
TTGATTTGTAATAACTCTATCAATAAAAATTTCTAAATCCAAAACAAAATCCAGTACCTGACGGCATGCGACTGGCCCAATTCGCCCTATAG  
TGAGTCGATTACAATTCACGTGCCGCTGTTTTACAACGCTGCTGACTGGGAAAAACCCCTGGCGTTACCCAATTAATCGCCTGACACATGCCCTTTCT  
GCCAGCT

p2GW7-LbCpf1-HA, plant-codon-optimized LbCpf1.

Amp-R35s promoter 5' NLS pLbCpf1 3' NLS HA Stop codon 35s terminator

GGCGTAAATAGCGAAGAGGCCGCGACCCGATCGCCCTTCCAAACAGTTGCGCAGCCTGAATGGCGAATGGACGCGCCCTGTAGCGGCGCATTAAGCAGCGGG  
GGTGTGGTGGTTACGCGCAGCGTACCGCTACACTTGCAGCGCCCTAGCGCCGCTCTTTCGCTTTCTTCCCTTCTTCTCGCCAGCTTCGCCGGCT  
TTCCCGTCAAGCTCTAAATCGGGGGCTCCCTTAGGGTCCGAATTTAGTGTTCAGCGCACCTCGACCCAAAAAATGATAGGGTGAATGTTTCAAG  
TAGTGGGCCATCGCCCTGATAGACGGTTTTTCGCCCTTGTGACGTTGAGTCCAGCTTCTTAATAGTGGACTCTTGTTCAAAACGAAACACTCAAC  
CCTATCTCGTCTATTCTTTGATTTATAAGGGATTTGCGGATTTGCGCCTATTGGTTAAAAAATGAGCTGATTAACAAAAATTAACGCGAATTTTA  
ACAAAATATTAAACGCTTACAATTTCTGATGCGGATTTTCTCCTTAGCATCTGTGCGGATTTTACACCCGATCAGGTGGCACTTTTCGGGGAAATG  
GCGCGGAACCCCTATTTGTTATTTTCTAAATACATTCAAATATGATTCGCTCATGAGACAATAACCTGATAAATGCTTCAATAATATTGAAAAAG  
AAGATATAGATATTCAACATTTCCGCTGCCCTTATCCCTTTTGGCGGATTTTGCCTTCTGTTTTTGCTCAACGAAACGCTGGTGAAGTAA  
AAGATGCTGAAGATCAGTTGGGTGACGAGTGGGTTACATCGAACTGGATCTCAACAGCGGTAAGATCCTTGAGAGTTTTCGCCCCGAGAACGTTTTCC  
AATGATGAGCACTTTTAAAGTTCTGCTATGTGGCGCGGATTTATCCGATTTGACGCGGGCAAGAGCAACTCGGTGCGCCGATACACTATTCTCAGAA  
GACTTGGTTGAGTACTCACCAGTCAAGAAAAGCATCTTACGGATGGCATGACAGTAAGAGAATTAAGCAGTGTCCATAAACCATGAGTGATAACACTG  
CGGCCAATTTACTTCTGACAACGATCGGAGGACCGAAGGAGCTAACCGCTTTTTGCAACAACATGGGGGATCATGTAACCTCGCCTTGTATCGTTGGAAAC  
GGAGCTGAATGAAGCCATACCAAACGACGAGCGTGACACCACGATGCTGTAGCAATGGCAACAACGTTGCGCAAACTATTAACTGGCGAACTACTTACT  
CTAGCTTCCCGGCAACAATTAAGACTGGATGGAGGCGGATAAAGTTGACAGGACCACTTCTGCGCTCGGCCCTTCCGGCTGGCTGGTTATTGCTGATA  
AATCTGGAGCCGGTGAGCGTGGGTCTCGCGGATCATTGACGACTGGGGCCAGATGTTAAGCCCTCCCGTATCGTAGTTATCTACACGACGGGAGTCA  
GGCAACTATGGATGAACGAATAGACAGATCGCTGAGATAGGTGCCCTCACTGATTAAGCATTGGTAACTGTACAGCAAGTTTACTCATATATACTTTAG  
ATTGATTTAAACTTCATTTTTAATTTAAAGGATCTAGGTGAACTCTTTTGTATAATCTCATGACCAAAATCCCTTAAAGCTGAGTTTTCGTTCCACT  
GAGCGTCAGACCCGATAGAAAAGTCAAAGGATCTTCTTGAGATCCTTTTTTCTGCGCGTAATCTGCTGCTTGCAAAACAAAAAACCACCGCTACCAGC  
GGTGGTTGTTTCCGGATCAAGAGCTACCAACTCTTTTCCGAAGGTAACCTGGCTTACGACAGCGCAGATACCAAATACTGTTCTTCTAGTGTAGCCG  
TAGTTAGGCCACCACTTCAAGAACTCTGTAGCACCCTACATACCTGCTGCTGTAATCCTGTTACCAAGTGGCTGCTGCCAGTGGCGATAAAGTCTGTCT  
TTACCGGTTGGACTCAAGACGATAGTTACCGGATAAGCGCAGCGCTCGGGCTGAACGGGGGTTGCTGACACAGAGCCAGCTGGAGCGAACGCACTA  
CACCGAACTGAGATACCTACAGCTGAGCTATGAGAAAGCGCCACGCTTCCGAAAGGAGAAAAGCGGACAGGATCCGGTAAGCGGCAGGGTCCGAAACA  
GGAGAGCGCACGAGGGAGCTTCCAGGGGAAACGCCCTGGTATCTTTATAGTCTGTGCGGTTTCCGCCACTCTGACTTGAGCGCTGATTTTTGTGATGCT  
CGTCAAGGGGGCGGAGCTTGAAAAAACGCCAGCAACGCGGCCCTTTTACGGTCTTGGCCTTTTGTGCTGACATGTTCTTCTGCGTT  
ATCCCTGATTTCTGGATAACCGTATTACCGCTTTGAGTGAAGTACCGCTCGCCGACGGCAACGACCGAGCGCAGGCTGAGTGGCGAGGAA  
GCGAAAGAGCGCCCAATACGCAAAACCGCTCTCCCGCGGCTGGCCGATTCATTAACAGCTGGCACGACAGGTTTCCCGACTGGAAAGCGGCGAGTG  
AGCGCAACGCAATTAATGTGAGTTAGCTCACTATTAGGCACCCAGGCTTACACTTTATGCTTCCGGCTCGTATGTTGTGGAATTTGAGCGGATA  
ACAATTTACACAGGAAACAGCTATGACCATGATTACGCCAAGCTATTAGGTGACACTATAGAATACTCAAGCTATGCATCCAACGCGTTGGGAGCTCT

CCCATATGGTCGACTAGAGCCAAGCTGATCTCCTTTGCCCGGAGATCACCATGGACGACTTCTCTATCTCTACGATCTAGGAAGAAAGTTCGACGGAG  
AAGGTGACGATACCATGTTACCACCCGATAATGAGAAAGATTAGCCTCTCAATTTTCAGAAAGAAATGCTGACCCACAGATGGTTAGAGAGGCCTACCGGGC  
AGGTCATCAAGACGATCTACCCGAGTAAATCTCCAGGAGATCAAATACCTTCCCAAGAAGGTTAAAGATGCAGTCAAAGATTCCAGGACTAACTGC  
ATCAAGAACACAGAGAAAGATATATTTCAAGATCAGAAGTACTATTCAGTATGGAGCATTCAAGGCTTGCTTCAATAAACCAAGGCAAGTAATAGAGA  
TTGGAGTCTCTAAGAAAGTAGTTCCTACTGAATCAAAGGCCATGGAGTCAAAAATTGAGATCGAGGATCTAACAGAACTCGCCGTGAAGACTGGCGAAC  
GTTTCATACAGAGTCTTTTACGACTCAATGACAAGAAGAAAATCTTCGTCAACATGGTGGAGCAGCAGACTCTCGTCTACTCCAAGAATATCAAAGATACA  
GTCTCAGAAGACCAAGGGCTATTGAGACTTTTCAACAAAGGGTAATATCGGGAACCTCCTCGGATTCATTGCCAGCTATCTGTCACTTCAATCAAAA  
GGACAGTAGAAAAGGAAGGTGGCACCACAAATGCCATCATTGCGATAAAGGAAAGGCTATCGTTCAAGATGCCTTCCGACAGTGGTCCAAAGATGG  
ACCCCCACCACAGGAGCATCTGGGAAAAAGAACGCTTCAACACAGCTCTCAAAGCAAGTGGATTGATGTGATATCTCCACTGACGTAAGGGATGAC  
GCACAATCCACTATCCTTCGCAAGACCTTCTCTATATAAGGAAGTTCATTTCAATTTGGAGAGGACTCCGGTATTTTTACAACAATACCACAACAAAA  
CAAACAACAAACACATTACAATTTACTATTCAGTGAAGCTGACAGGCGCCGACTAGTGATATCACAAGTTGTACAAAAAGCAGGCTTCAATGGCCC  
CAAGAAGAAGCGGAAGTTCGGGATCACGGAGTCCAGCAGCCATGAGTAAGCTGGAGAAATTTACGAATTTGTATAGCTGTCCAAGACACTGAGGTT  
CAAGGCTATCCCGTTGGAAAAAACAAGAGAAATATCGATAACAAGCGTCTGCTGGTTGAGGATGAGAAGAGAGCGGAAGACTATAAGGGAGTCAAAAA  
CTTCTGGATAGATACTATCTGTCTTTATAAACGACGTGCTGCATTCCATTAATTTGAAGAATCTGAACAATAATTTCCCTGTTCCGAAAGAAGACGA  
GAACAGAGAAAAGAAAATAAGGAGCTGGAAAACCTGGAGATCAACTGAGGAAGGAGATTGCAAAGGCTTTCAAGGAAATGAAGGTTATAAGAGCCTGTT  
CAAAAAAGATATTTATGAAACTATACGCTGAAATTTCTCGATGATAAGGATGAGATCGCGCTCGTGAACAGCTTTAACGGATTCACGACTGCCTTTACT  
GGATTTTCGATAAATAGGGAACATGTTCTCAGAGGAAGCCAAGAGCACCTCGATCGCTTTTCGTTGCATAAATGAGAATTTGACAAGATACATCAGCA  
ACATGGACATTTTCGAGAAGGTGATGCGATCTTGATAAAGCATGAGGTTCAAGGATTAAGGAGAAGATTCTGAACCTGATTTGATGTTGAGGATTT  
CTTGAAGGAGAATTTTTAATTTTCGTTTGACACAGGAAGGTATAGATGTGATAACGCTATATCGGTGGGTCGTTACCGAATCAGGGGAGAAGATA  
AAGGGTCTGAATGAGTACATCAATCTGTATAACCCAGAAGACAAAGCAGAACTGCCAAAATTCAGGCTCTCTATAAGCAAGTCTGAGCGATCGGGAGT  
CGCTTTCGTTCTACGGTGAAGGTTATACCAGCGATGAGGAGTACTGGAGGCTTTAGAAAACCTCTGAACAAGAATAGCGAAATTTCTCTCCATTA  
GAAGCTGGAGAAGCTGTTCAAGAAATTTGATGAGTACTCGAGCGCAGGATTTTCGTAAGAAGCAGGACTGCTATAAGCACTATTAGCAAGGATTTTTT  
GGAGAGTGGAAATGTTATTCGGGATAAGTGAATGCAGAGTACGACGATATACACCTGAAGAAGAAGGCTGTGGTAACGAGAAGTATGAGGACGATAGAC  
GCAAAAGCTCAAGAAGATCGGTTCTTTAGCCTGGAGCACTGCAGGAGTATGCGGACGAGATCTGAGCGTGGTGAAGAACTGAAGGAGATCATTAT  
CCAAAAGGTGGATGAGATTTACAAGGTATACGGTAGCTCAGAAAAGCTCTTTGATGCGATTTTCGTTCTCGAAAAGAGCCGAAAGAAGATGATGCTGTT  
GTTGCTATAATGAAGGACCTGCTCGATAGCGTTAAGAGCTTTGAGAATTACATCAAGGCATCTTTGGCGAGGGAAAGGAAACAACAGAGACGAAAGCT  
TCTATGGCGACTTTGTGCTAGCTTATGACATCCTGCTGAAGGTAGACCATATATATGATGCAATTCGTAATACGTTACCCAAAAGCCGACAGCAAGGA  
TAAGTCAAACCTATTTTCAAACCCGCAATTTATGGGTGGCTGGGATAAGGACAAGGAAACAGATTTATAGGGCCACTATCTGCGATATGGCAGCAAG  
TACTACCTCGCTATCATGGATAAAGAGTATGCTAAGTGTCTCCAGAAGATAGATAAGGACGACGTGAACGGAAATACGAGAAGATTAATTACAAGCTAC  
TGCTTGGGCTAACAAAGATGCTGCCAAAAGCTTCTTTCAAAGAAATGGATGGCTTACTACAACCCATCAGAGGATATCCAAAAGATATACAAAAATGG  
GACCTTTAAAAAGGGAGACATGTTAACTGAATGACTGCCATAAGCTGATCGATTTTTTAAAGGATAGCATCAGCAGATATCTTAAGGGTCAAGGATTT  
TATGATTTAATTTCTCCGAAACAGAGAAGTATAAGGACATTGCTGGTTCTATAGGGAAGTGAAGAACAAGGTTATAAGGTTAGCTTTGAATCGGCTT  
CAAAGAAGGAAGTTGATAAACTAGTGAAGAAGGTAAGCTCTATATGTTCAAATTTACAACAAGGATTTTCCGACAAGTCTCACGGAACCTCAACCT  
TCATACGATGATTTTAAAGCTGCTGTTGATGAGAACAATCACGGCCAAATACGACTCTCCGGTGGAGCAGAACTTTTATGCGGAGAGCGAGCCTCAAG  
AAAGAAGAACTTGTTGTTCACTCCGCCAACAGCCGATGCTAACAAGAATCCAGATAACCCTAAGAAGACTACAACACTGTCTGATGATTTATAAGG  
ATAAGCTTTTCGGAAGACCAGTATGAGTGCACATACCAATAGCAATCAATAAGTGCCCAAAGAACATTTCAAATCAACACCGAGGTTGCTGTTCT  
GCTGAAGCATGACGATAACCCGTACGTGATAGGAATGACAGGGGGGAGAGAAACCTGCTGTATATCGTAGTCTGATGGAAGGGCAACATCGTTGAG  
CAGTACAGCTTGAATGAAATCATTAAACAATTTAACGGTATACGTATCAAGACTGACTACCATAGCCTGCTGGATAAAGAAGGAGAAGGAGAGATTCCAGG  
CAAGGCAAACTGGACGAGCATCGAAAACATCAAGGAACATAAGGCGGGTTATATCAGCCAAGTAGTCCATAAGATTGTGAGCTGGTGGAGAAGTATGA  
CGCTGCTCATCGCTTGGAGGATCGAATTCGGCTTCAAATAAGCCGGTGAAGTGGAGAAGCAGGATACCAAAGTTTTGAGAAGATGCTCATCGAT  
AAGCTAAACTACATGTTGATAAAAAGAGCAATCCGTGCGCCACAGGAGGAGCTCTCAAAGGGTACCAAATAACCAACAAGTTGAAAAGCTTCAAGTCAA  
TGAGCACACAAAACGGGTTATTTTTATATACCAGCATGGCTGACGAGCAAGATTGATCCAGCACTGGTTTTGTCAACCTGCTGAAGACCAAGTATAC  
TAGCATTGCTGATTTCAAAGGTTTATTTGAGCTTCCAGCCTGATTTGATGCTCCAGAGGAGGATCTGTTGCAATTCGCGCTGGATTACAAGAACTTC  
AGCAGAACCAGTGTGATTAATTAAGAAGTGAAGCTGACTTACGGTAATAGAATAAGGATCTTCAGAAAACCTAAGAAAAACAACGTTGCTGAT  
GGGAAGAGGCTGCTCACTAGCGCGTATAAGGAGCTGTTCAATAAGTACGGAATAAATACCAGCAAGGGGACATCCGCGCTCTGCTGTGTGAACAGAG  
TGACAAAGCATTTTATAGCAGTTTCATGGCGCTGATGAGCCTGATGCTGCAGATGCGAAAACAGCATTACTGGTGAACAGAGCTTGACTTTCTCATCAGC  
CCTGTGAAGAACAGCAGCGAATCTTTACGATTCAGGAACACAGGACACAGGAAAACGCTATTCTGCTAAAACAGCTGATGCAACAGGAGCCTATA  
ACATTGCACGAAAAGTTCTGTGGGCTATGGACAGTTCAGAAGGCTGAAGATGAGAAGCTAGATAAGGTAAGATAGCTATTAGCAATTAAGGAATGGCT  
GGAGTACGCACAAACATCCGTTAAGCACAAAAGGCCGGCCAGCAAAAAAGGCCAGGCAAAAAAGAAAAGGGATCTTACCATACGATGTTCCCA  
GATTAGCTTATCCCTACGACGTGCTGATTTGATGATACCCATATGATGTCGCCGACTATGCCAACCCAGCTTTCTGTACAAGGTTGATATGCC  
CGGGCCTAGTAGAGTCCGAAAAATCACCAGTCTCTCTCAAAATCTATCTCTCTATTTTTCTCCAGAATAATGTGTGAGTAGTCCAGATAAGG  
GAATAGGGTTCTTATAGGGTTTCGCTCATGTGTGAGCATATAAGAAACCTTAGTATGATTTGTATTTGATAAAATACCTTATCAATAAAAATTTCTA  
ATTCTAAAACAAAATCCAGTGACCTGCAGGATGCGACGTGGGCCAATTCGCCCTATAGTGAGTGTATTACAATTCAGTGGCCGTGTTTTACAA  
CGTCTGACTGGGAAAACCTTGGCGTTACCCAACTTAATCGCCTTGACGACATACCCCTTTTCGCCAGCT
